1 **S. Typhimurium impairs glycolysis-mediated acidification of phagosomes to evade**  
2 **macrophage defense**

3 Saray Gutiérrez<sup>1</sup>, Julia Fischer<sup>1,3</sup>, Raja Ganesan<sup>3</sup>, Gökhan Cildir<sup>3</sup>, Martina Wolke<sup>2</sup>,  
4 Alberto Pessia<sup>7</sup>, Peter Frommolt<sup>4</sup>, Vincenzo Desiderio<sup>6</sup>, Vidya R Velagapudi<sup>7</sup>, Nirmal  
5 Robinson<sup>1,2,3</sup>

6

7 <sup>1</sup>Cologne Excellence Cluster on Cellular Stress Responses in Aging-Associated  
8 Diseases (CECAD), University of Cologne, Cologne, Germany

9 <sup>2</sup>Institute for Medical Microbiology, Immunology and Hygiene, University of Cologne,  
10 Cologne, Germany

11 <sup>3</sup>Centre for Cancer Biology, University of South Australia, Adelaide, Australia

12 <sup>4</sup>First Department of Internal Medicine, University of Cologne, Cologne, Germany

13 <sup>5</sup>Bioinformatics Facility, CECAD, University of Cologne, Cologne, Germany

14 <sup>6</sup>Department of Precision Medicine, University of Campania “Luigi Vanvitelli”,  
15 Naples, Italy

16 <sup>7</sup>Metabolomics Unit, Institute for Molecular Medicine Finland FIMM, Helsinki,  
17 Finland

18

19 **Key words:** *Salmonella*, macrophages, glycolysis, immunometabolism, metabolomics,  
20 phagosome, antigen-presentation, and lysosomes.

21 \* **Correspondence:** Nirmal Robinson ([nirmal.robinson@unisa.edu.au](mailto:nirmal.robinson@unisa.edu.au))

22

23

24

25

26

27

28

29

30 **Abstract**

31 Regulation of the cellular metabolism is now recognized as a crucial mechanism for the  
32 homeostasis of innate and adaptive immune cells upon diverse extracellular stimuli.  
33 Macrophages, for instance, increase glycolysis upon stimulation with pathogen-  
34 associated molecular patterns (PAMPs). Conceivably, pathogens also counteract these  
35 metabolic changes for their own survival in the host. However, despite this dynamic  
36 interplay in host-pathogen interactions, the role of immunometabolism in the context  
37 of intracellular bacterial infections is still unclear. Here, employing unbiased  
38 metabolomic and transcriptomic approaches, we investigated the role of metabolic  
39 adaptations of macrophages upon *Salmonella enterica* serovar Typhimurium  
40 (*S. Typhimurium*) infections. Importantly, our results suggested that *S. Typhimurium*  
41 abrogates glycolysis and its modulators such as insulin-signaling to impair macrophage  
42 defense. Mechanistically, glycolytic enzyme aldolase A is critical for v-ATPase  
43 assembly and the acidification of phagosomes upon *S. Typhimurium* infection, and  
44 impairment in the glycolytic machinery eventually leads to decreased bacterial  
45 clearance and antigen presentation in macrophages. Collectively, our results highlight  
46 a vital molecular link between metabolic adaptation and phagosome maturation in  
47 macrophages, which is targeted by *S. Typhimurium* to evade cell-autonomous defense.

48

49

50

51

52

53

54

## 55 **Introduction**

56           Macrophages are sentinel immune cells playing pivotal roles in the host defense.  
57 They not only engulf and degrade the pathogens, but also secrete cytokines and present  
58 antigens to T cells to mount an effective adaptive immune response (1). Several  
59 pathogens such as *Salmonella enterica* serovar Typhimurium (*S. Typhimurium*) are  
60 restrained in phagosomes after being quickly phagocytosed by macrophages. However,  
61 *S. Typhimurium* also has evolved mechanisms to evade the hostile milieu of lysosomes  
62 and induce inflammatory cell death in macrophages. We have previously shown that  
63 *S. Typhimurium* induces type I interferon (IFN-I)-dependent and receptor-interacting  
64 serine/threonine-protein kinase 3 (RIP3)-mediated necroptosis in macrophages (2). It is  
65 also known that pro-inflammatory, necrotic cell death is associated with energy  
66 deficiency and metabolic instability in the cells (3). For instance, transfer of IFN-I  
67 receptor (IFNAR)-deficient or RIP3 kinase-deficient macrophages (that are cell death  
68 resistant) to wild type (WT) mice promotes better control of the pathogen implying that  
69 metabolically stable macrophages are more efficient in the control of pathogens (2).

70           A balanced immune response and metabolic homeostasis against invading  
71 pathogens are vital. Because substantial amount of energy is consumed when cells  
72 respond to immune stimuli, it is essential that they metabolically adapt to the demand  
73 (4). Recent studies highlighted the metabolic adjustments macrophages and dendritic  
74 cells undergo upon toll like receptor 4 (TLR4) activation with lipopolysaccharide (LPS)  
75 (5, 6). It has also been suggested that classically activated macrophages (M1), which  
76 respond readily to bacterial infections, derive their energy predominantly through  
77 glycolysis. On the other hand, alternatively activated macrophages (M2), which help in  
78 maintaining tissue homeostasis, obtain their energy mainly through oxidative  
79 phosphorylation (OXPHOS) (7, 8). Notably, metabolic intermediates arising from

80 different metabolic pathways also significantly modulate the inflammatory response in  
81 immune cells. For instance, intracellular metabolites such as dimethyl fumarate (DMF)  
82 and itaconate have recently been found to modulate the innate and adaptive immune  
83 responses (9, 10). Similarly, tricarboxylic-acid (TCA) cycle intermediate succinate also  
84 modulates inflammation through Hypoxia-inducible factor 1-alpha (HIF-1 $\alpha$ ) in M1  
85 macrophages (11). Thus, there is a dynamic crosstalk between metabolic intermediates  
86 and innate immune responses. Pathogens such as *S. Typhimurium* could also target this  
87 crosstalk and impair the metabolic homeostasis in macrophages. It has been reported  
88 that *S. Typhimurium* persists in M2 macrophages in a long-term infection model by  
89 sustaining fatty acid metabolism (12). Furthermore, *S. Typhimurium* also depend on its  
90 glycolysis machinery for survival in macrophages (13). We had also reported that the  
91 pathogen targets energy sensors such as AMPK and Sirtuin 1 for lysosomal degradation  
92 (14). More recently, we had shown that *S. Typhimurium* enhances leptin signaling to  
93 evade lysosomal degradation in macrophages (15). However, the implications of the  
94 metabolic pathways in macrophage defense against invading pathogens are largely  
95 unknown.

96 To understand the metabolic perturbations induced by *S. Typhimurium*, we  
97 performed an integrative metabolomics and transcriptomics analysis on macrophages  
98 infected with *S. Typhimurium*. This combined omics approach has revealed that  
99 glycolysis and its associated signaling pathways, such as insulin signaling facilitating  
100 glycolysis, are significantly down regulated upon *S. Typhimurium* infection.  
101 Furthermore, we show that down regulation of glycolysis by direct chemical inhibition  
102 or by genetically disrupting insulin-signaling in myeloid cells leads to elevated bacterial  
103 burden and impaired antigen presentation as a result of reduced acidification of  
104 phagosomes. Importantly, we also demonstrate that glycolysis regulates the assembly



105 of vacuolar-type H<sup>+</sup>-ATPase complex (v-ATPase) and hence the acidification of  
106 phagosomes and glycolytic enzyme aldolase A critically regulates this process. Overall,  
107 our findings suggest that the Warburg-like-effect observed in macrophages upon  
108 infection is critical for the phagosome/lysosome-mediated clearance of pathogens.  
109 Moreover, pathogens such as *S. Typhimurium* have evolved strategies to disrupt this  
110 immunometabolic homeostasis in macrophages.

111

## 112 **Results**

### 113 ***S. Typhimurium* infection promotes metabolic reprogramming in macrophages**

114 To comprehensively characterize the metabolic alterations caused by  
115 *S. Typhimurium* infection, we carried out mass spectrometric analysis of metabolites in  
116 bone marrow-derived macrophages (BMDMs) infected with *S. Typhimurium* for 2h.  
117 As depicted in the PLSDA plot (**Figure S1A**) and in the heat map analysis of  
118 metabolites (**Figure 1A** for top-25 altered metabolites, **Figure S1B** for all metabolites  
119 analyzed), *S. Typhimurium*-infected macrophages presented a distinct metabolic  
120 profile when compared to uninfected (UI) controls. Metabolic pathway enrichment  
121 analysis revealed that carbohydrate-metabolism, which provides pyruvate for  
122 mitochondrial metabolism, and insulin signaling, which regulates glycolysis, were  
123 among the highly enriched pathway components upon *S. Typhimurium* infection  
124 (**Figure 1B**). Energy metabolites such as NAD<sup>+</sup> was also highly down regulated upon  
125 *S. Typhimurium* infection (**Figures S1C**).

126 Complementary to this metabolite analysis, we also performed RNA-  
127 sequencing (RNA-seq) in BMDMs infected with *S. Typhimurium* at the same time  
128 point (2h). Consistent with the decrease in metabolites of glycolysis, RNA-seq data  
129 from BMDMs also showed that levels of genes involved in carbohydrate metabolism

130 and insulin signaling were significantly down regulated (**Figures 1C, 1D and S1D**).  
131 Western blot analysis further confirmed that the expression levels of insulin receptor  
132 (IR) and its downstream target phosphorylated glycogen synthase kinase 3 (p-GSK3)  
133 were reduced upon *S. Typhimurium* infection (**Figure S1E and Figure S1F**). In  
134 contrast, negative regulators of insulin signaling such as suppressors of cytokine  
135 signaling (SOCS) (16) and PTEN signaling pathway components (17) were up  
136 regulated (**Figures 1C and 1D**). Thus, metabolomics and transcriptomics together  
137 indicate that *S. Typhimurium* infection downregulates glycolysis and insulin-signaling  
138 that facilitates glycolysis.

139

#### 140 **Virulence dependent inhibition of glycolysis in *S. Typhimurium* infected** 141 **macrophages**

142 Macrophages are known to undergo a switch in metabolism from OXPHOS to  
143 glycolysis upon various extracellular stimuli (18). However, the metabolic changes that  
144 occur upon intracellular bacterial infections are less understood. To show that  
145 glycolysis is indeed targeted by *S. Typhimurium*, we specifically analyzed the  
146 metabolites derived from glycolysis. This analysis confirmed that most of the  
147 metabolites generated upon breakdown of glucose were decreased, indicating that  
148 glucose flux was reduced upon infection with *S. Typhimurium* (**Figures 2A and S2A**).  
149 Consistently, *S. Typhimurium* infection of macrophages resulted in a decline in  
150 extracellular acidification rate (ECAR) at 4h, indicating reduced glycolytic flux, a  
151 phenomenon that was not observed upon LPS treatment (**Figure 2B**). Moreover,  
152 western blot analysis showed that the expression of Glut1, the main glucose transporter  
153 in macrophages (19), was significantly increased early upon infection (0.5-2h) followed  
154 by a decline during the later phase of infection (4h) (**Figure 2C**). In line with this, the

155 levels of glucose-sensitive transcription factor MondoA and HIF-1 $\alpha$  were also  
156 transiently up regulated (0.5-2h) and then down regulated over time (4h) (**Figure 2D**  
157 **and 2E**). Importantly, the change in the levels of Glut1 and the glucose-responsive  
158 transcription factors also correlated with the glucose uptake. Uptake of fluorescent  
159 glucose analogue 2-NBDG immediately upon infection was increased followed by a  
160 steady decline during the course of *S. Typhimurium* infection (**Figure 2F**). Our  
161 transcriptomics analysis revealed that majority of the glycolytic genes were down  
162 regulated upon *S. Typhimurium* infection in comparison to uninfected controls (**Figure**  
163 **S2B**). Despite an increase in glucose intake during the early phase of infection, the  
164 glycolytic metabolites were declined. Therefore, it is conceivable that *S. Typhimurium*  
165 actively blocks the proportionate up regulation of genes that are required to regulate the  
166 glycolytic flux.

167         Next, we asked if the down regulation of glycolysis is a pathogenic mechanism  
168 of *S. Typhimurium*. Importantly, we observed that infection with heat-killed  
169 *S. Typhimurium* did not decrease the uptake of 2-NBDG (**Figure S2C**). To gain further  
170 insights into the virulence-dependent regulation of macrophage glycolysis by  
171 *S. Typhimurium*, we investigated the ability of two different *S. Typhimurium* mutants  
172 (known as *ssrB* and *invA*) to modulate the glycolytic response upon infection.  
173 Remarkably, *S. Typhimurium* mutant defective for expression of *invA*, a component of  
174 *Salmonella* pathogenicity island 1 (SPI-I), was significantly impaired in its ability to  
175 modulate glucose intake (**Figure S2D**) and ECAR (**Figure 2G**). On the other hand,  
176 *S. Typhimurium* mutant defective for SPI-2-encoded transcriptional regulator *ssrB* was  
177 not impaired in its ability to regulate these parameters (**Figure S2D and 2G**).  
178 Furthermore, the *invA* mutant *S. Typhimurium* was also unable to regulate the levels of  
179 Glut1 and glycolytic enzymes HK-2 and Enolase upon infection in macrophages

180 **(Figure 2H)**. Overall, our analysis suggest that *S. Typhimurium* infection modulated  
181 glycolysis is virulence dependent.

182

### 183 **Macrophages depend on glycolysis for the clearance of intracellular bacteria**

184 Since we found that *S. Typhimurium* downregulates glycolysis during the later  
185 phase of infection in BMDMs, we sought to determine the significance of glycolysis in  
186 the macrophage defense against *S. Typhimurium*. As the predominant function of  
187 macrophages is to eliminate invading pathogens, we studied the ability of BMDMs to  
188 degrade *S. Typhimurium* following a pre-treatment with the metabolically inactive  
189 glucose analogue 2-Deoxyglucose (2-DG) that inhibits glycolysis. Importantly, we  
190 found increased number of bacteria in macrophages when glycolysis was inhibited with  
191 2-DG **(Figure 3A)**. Similarly, inhibition of glucose uptake by Glut1 inhibitor Fasentin  
192 also increased the number of intracellular bacteria after 24h of infection **(Figure S3A)**.  
193 It is well known that insulin signaling modulates glycolysis by regulating the cellular  
194 intake of glucose (20) and it has also been shown that myeloid-specific insulin receptor  
195 (IR) deficiency alters inflammation (21). We further show that glucose uptake **(Figure**  
196 **S3B)** was reduced in IR<sup>Δmyel</sup> BMDMs compared to that of the IR<sup>fl/fl</sup> (WT) and also  
197 observed a reduction in Glut1 **(Figure S3C)**. Therefore, we next examined whether IR  
198 deficiency affects cell-autonomous defense against *S. Typhimurium* in macrophages.  
199 IR-deficient macrophages had increased bacterial burden upon infection with  
200 *S. Typhimurium* **(Figure 3B)**. However, treatment of macrophages with recombinant  
201 insulin did not enhance the elimination of *S. Typhimurium* **(Figure S3D)**. This is not  
202 surprising as our data show that insulin receptor and the downstream signaling are down  
203 regulated upon *S. Typhimurium* infection **(Figures 1D and S1F and S1G)**. Strikingly,  
204 when glucose uptake **(Figure S3E)** and ECAR **(Figure S3F)** were enhanced upon

205 treatment with the glycolysis activator 4-hydroxytamoxifen (4-OHT) (22, 23), bacterial  
206 burden significantly decreased in macrophages (**Figure 3C**). Importantly, inhibition of  
207 glycolysis using 2-DG prevented enhanced bacterial clearance triggered by the  
208 treatment of 4-OHT (**Figure S3G**), confirming that 4-OHT-mediated enhanced  
209 bacterial elimination is glycolysis-dependent. Moreover, we found that the requirement  
210 of glycolysis for the clearance of intracellular bacteria is not specific for  
211 *S. Typhimurium*. Pathogens such as *Listeria monocytogenes* (*L. monocytogenes*)  
212 (**Figure 3D**) and *Staphylococcus aureus* (*S. aureus*) (**Figure 3E**) also survived better  
213 in 2-DG-treated macrophages. Similarly, IR-deficient macrophages also showed  
214 reduced ability to eliminate *S. aureus* (**Figure 3F**). Together, our results suggest that  
215 glycolysis plays a significant role in the elimination of intracellular bacteria.

216 Consistent with the increase in bacterial burden, secretion of pro-inflammatory  
217 cytokines IL-6 and TNF- $\alpha$  was also increased when 2-DG-treated macrophages were  
218 infected with *S. Typhimurium* (**Figure S3H**), *L. monocytogenes* (**Figure S3I**) or  
219 *S. aureus* (**Figure S3J**) or when IR <sup>$\Delta$ myel</sup> macrophages were infected with  
220 *S. Typhimurium* (**Figure S3K**). In line with these findings, *S. Typhimurium*-induced  
221 IL-6 and TNF- $\alpha$  levels were decreased when glycolysis was induced with 4-OHT  
222 (**Figure S3L**). Increased cytokine secretion upon 2-DG treatment also correlated with  
223 the enhanced activation of NF- $\kappa$ B and p38 MAPK (**Figure S3M**). Next, we sought to  
224 investigate the involvement of glycolysis to control *S. Typhimurium* infection *in vivo*.  
225 Consistent with the *in vitro* results obtained in BMDMs, IR <sup>$\Delta$ myel</sup> mice had increased  
226 bacterial burden in the liver after 3 days of *S. Typhimurium* infection compared to WT  
227 controls (**Figure 3G**). In contrast, 4-OHT-treated WT mice had significantly reduced  
228 *S. Typhimurium* in the liver (**Figure 3H**). Taken together, these results clearly suggest  
229 that increased glycolysis is beneficial for the clearance of bacteria *in vivo*.

230           Having found that glycolysis is required for the elimination of bacteria, we  
231 investigated whether the antigen processing and presentation could also be affected in  
232 macrophages when glycolysis is inhibited. To test this, we incubated 2-DG-treated and  
233 LPS-stimulated BMDMs with Ovalbumin (OVA) and analyzed the surface expression  
234 of the OVA peptide OVA<sub>323-339</sub> bound to the MHC class II complex using specific  
235 antibodies by flow cytometry. We found that 2-DG-treatment drastically decreased the  
236 levels of OVA<sub>323-339</sub>-MHC II complexes on the surface of macrophages (**Figure 3I**). To  
237 gain better insight into the effect of glycolysis on antigen processing inside the  
238 phagosome, we incubated 2-DG-treated macrophages with beads coated with OVA  
239 conjugated to Alexa Fluor 647 dye. Analysis of the fluorescence intensity of the isolated  
240 phagosomes showed increased retention of Alexa647-OVA in 2-DG-treated  
241 macrophages suggesting reduced processing of the antigen (**Figure 3J**). Similarly,  
242 inhibition of glycolysis by *S. Typhimurium* infection also resulted in decreased  
243 processing of Alexa647-OVA as seen by the increased mean fluorescence intensity  
244 (MFI) in isolated Alexa647-OVA-coated-bead-containing phagosomes (**Figure 3K**).  
245 The decrease in processing of Alexa647-OVA caused by *S. Typhimurium* infection was  
246 partially rescued by treatment with 4-OHT (**Figure S3N**). Taken together, these data  
247 demonstrate that glycolysis is required for efficient antigen processing and antigen  
248 presentation.

249

### 250 **Glycolysis is crucial for phagosome maturation upon infection in macrophages**

251 Macrophages engulf invading pathogens into phagosomes, which later fuse with  
252 lysosomes to degrade the pathogens. Increase in bacterial burden upon inhibition of  
253 glycolysis hinted that glycolysis could possibly regulate phagosomal functions in  
254 macrophages. To understand the role of glycolysis in phagosome maturation, we

255 performed a series of flow cytometric assays to analyze the  $\beta$ -galactosidase and  
256 proteolytic activities in phagolysosomes containing inert beads in macrophages. To this  
257 end, beads either coated with C<sub>12</sub>FDG (a substrate for  $\beta$ -galactosidase) or with DQ-  
258 BSA (a substrate for proteases) were incubated with the macrophages. These substrates  
259 fluoresce when they react with their corresponding enzymes. Notably, 2-DG treatment  
260 prior to phagocytosis of beads showed markedly reduced  $\beta$ -galactosidase (**Figure 4A**)  
261 and proteolytic activities (**Figure 4B**) in bead-containing phagosomes. A similar  
262 decrease in the activities of  $\beta$ -galactosidase (**Figure 4C**) and proteases (**Figure 4D**) was  
263 also observed in IR-deficient macrophages when compared to WT controls. However,  
264 no significant differences in the phagocytosis of beads were observed in 2-DG-treated  
265 or IR-deficient macrophages compared to untreated or WT controls, respectively  
266 (**Figures S4A and S4B**). To test if *S. Typhimurium* mediated downregulation of  
267 glycolysis mimicked the effect of 2-DG, macrophages were infected for 2h to ensure  
268 that *S. Typhimurium* downregulated glycolysis. Cells were then allowed to  
269 phagocytose C<sub>12</sub>FDG-coated beads, which were chased into phagolysosomes and the  
270 activity of  $\beta$ -galactosidase was analyzed by flow cytometry. Interestingly,  $\beta$ -  
271 galactosidase activity on C<sub>12</sub>FDG-labelled beads phagocytosed after 2h of  
272 *S. Typhimurium* infection was reduced compared to the activity on C<sub>12</sub>FDG-labelled-  
273 beads phagocytosed by uninfected cells (**Figure 4E**). Furthermore, we found increased  
274 fluorescence signal from C<sub>12</sub>FDG-labelled beads that were phagocytosed after 30 min  
275 of *S. Typhimurium* infection, corresponding to the time when *S. Typhimurium*  
276 transiently increased glycolysis (**Figure S4C**). These results suggest that glycolysis is  
277 required for the efficient function of phagolysosomes and *S. Typhimurium* prevents this  
278 homeostasis during the later phase of infection by downregulating glycolysis.

279



280 **Glycolysis critically regulates the acidification of phagosome and the assembly of**  
281 **v-ATPase complex**

282 The activity of lysosomal enzymes and the maturation of the phagosomes to  
283 phagolysosomes are highly dependent on the acidification of the vesicle (24). Since  
284 inhibition of glycolysis impaired the activity of lysosomal enzymes in macrophages,  
285 we investigated if there is a defect in the acidification of the phagosomal lumen.  
286 Acidification of the phagosomes was studied using *E. coli* bioparticles labelled with  
287 pHrodo, a pH sensitive dye, which increases fluorescence intensity upon acidification.  
288 Notably, phagosome acidification was significantly reduced in bioparticle-containing  
289 phagosomes in macrophages pre-treated with 2-DG when compared to untreated  
290 controls (**Figure 5A**). Consistently, acidification was also limited in bioparticle-  
291 containing phagosomes of IR<sup>Amyel</sup> macrophages compared to WT controls (**Figure 5B**).  
292 Furthermore, *S. Typhimurium*-mediated inhibition of glycolysis also impaired  
293 acidification of bioparticle-containing phagosomes (**Figure 5C**), but the acidification  
294 was increased upon infection with *invA* mutant (**Figure S5A**). Also, acidification of  
295 *S. Typhimurium*-containing phagosomes increased upon treatment with 4-OHT  
296 (**Figure S5A**). Remarkably, the observed decrease in phagolysosome acidification in  
297 *S. Typhimurium*-infected macrophages was rescued when macrophages were treated  
298 with 4-OHT (**Figure 5D**), suggesting that *S. Typhimurium* prevents phagolysosome  
299 acidification by impairing glycolysis.

300 Acidification of phagosomes is mediated by a multimeric protein complex  
301 known as vacuolar-ATPase (v-ATPase), which is composed of 14 subunits organized  
302 in two main catalytic macro domains: V<sub>0</sub> and V<sub>1</sub> (25). While V<sub>0</sub> is permanently bound  
303 to the membrane of phagosomes, V<sub>1</sub> is located in the cytosol and gets actively recruited  
304 onto the phagosome to interact with V<sub>0</sub> and thus activate the proton pump (26). To test



305 whether inhibition of glycolysis could have an effect on the assembly of the v-ATPase  
306 complex in macrophages, isolated bead containing-phagosomes from 2-DG-treated  
307 BMDMs and IR<sup>Δmyel</sup> BMDMs were analyzed for the expression of subunit-*a* and  
308 subunit-B which are part of the V<sub>0</sub> and the V<sub>1</sub> macro domains, respectively. V<sub>0</sub> subunit-  
309 *a* was detected in comparable amounts in bead containing-phagosomes isolated from  
310 2-DG-treated and untreated controls (**Figure 5E**). Similarly, abundance of V<sub>0</sub> subunit-  
311 *a* was comparable in phagosomes isolated from IR<sup>Δmyel</sup> macrophages and the WT  
312 controls (**Figure 5G**). However, the expression of the V<sub>1</sub> subunit-B was reduced in the  
313 phagosomes isolated from 2-DG-treated macrophages (**Figure 5E and 5F**). Similarly,  
314 we found reduced levels of the V<sub>1</sub> subunit-B in bead containing-phagosomes isolated  
315 from IR<sup>Δmyel</sup> macrophages (**Figure 5G and 5H**) and from fasentin-treated macrophages  
316 when compared to WT controls (**Figure S5B**). Notably, we did not observe differential  
317 amounts of V<sub>0</sub> and V<sub>1</sub> subunits in the total cell lysates of 2-DG-treated macrophages  
318 compared to controls (**Figure S5C**) or in fasentin-treated cells compared to untreated  
319 controls (**Figure S5D**). These findings suggest that impaired glycolysis prevents the  
320 assembly of the v-ATPase complex rather than the expression itself. V<sub>1</sub> recruitment on  
321 to phagosomes containing *S. Typhimurium* was also reduced, while V<sub>0</sub> levels did not  
322 vary significantly between different time points (**Figures 5I**). The decline in V<sub>1</sub> on  
323 phagosomes harboring *S. Typhimurium* corresponded with the time when glycolysis  
324 was inhibited (**Figure 2A-2E**). Similarly, Proximity Ligation Assay (PLA) also showed  
325 reduced interaction of V<sub>0</sub> and V<sub>1</sub> in 2-DG-treated macrophages (**Figures 5K and 5L**).  
326 The decreased interaction between V<sub>0</sub> and V<sub>1</sub> upon *S. Typhimurium* infection was also  
327 confirmed by PLA (**Figures S5E and S5F**). We also immunoprecipitated (IP) V<sub>0</sub> from  
328 isolated *S. Typhimurium*-containing phagosomes and observed the complex formation  
329 of V<sub>0</sub> and V<sub>1</sub> however, V<sub>1</sub> binding to V<sub>0</sub> was reduced in *S. Typhimurium*-phagosomes

330 isolated after 6h (**Figure 5M**). To further investigate the effect of the inhibition of  
331 glycolysis on v-ATPase complex formation, we conducted Native SDS-PAGE using  
332 isolated bead- containing phagosomes from macrophages treated or untreated with 2-  
333 DG. 2-DG treatment resulted in a significant decrease in the formation of v-ATPase  
334 complex (**Figure 5N**). Taken together, these results strongly suggest that glycolysis  
335 plays a critical role in the assembly of v-ATPase.

336

### 337 **Aldolase A critically regulates the assembly of v-ATPase and phagosome** 338 **acidification**

339 Glycolytic enzymes aldolase A and phosphofructokinase-1 (PFK1) have been shown  
340 to interact with different subunits of the v-ATPase in yeast, likely acting as scaffold  
341 proteins and are required for the acidification of endosomes (27, 28). Confocal  
342 microscopy confirmed that aldolase A colocalized with inert E-coli bioparticles-  
343 containing phagosomes when glucose was abundant (**Figures 6A**). However, co-  
344 localization of aldolase A with *E. coli* particles-containing phagosomes was  
345 significantly reduced upon glycolysis-inhibition with 2-DG (**Figures 6A and 6B**).  
346 Aldolase A colocalized with *S. Typhimurium*-containing phagosomes as early as 30  
347 min post infection, but the amount of *S. Typhimurium*-phagosomes positive for  
348 aldolase A was reduced 4h post infection (**Figure 6C**). PLA analysis revealed  
349 interaction between  $V_0$  and Aldolase A in untreated macrophages. However, the number  
350 of red puncta (indicating interaction between  $V_0$  and Aldolase A) was significantly  
351 reduced upon treatment with 2-DG (**Figure 6D**).  $V_0$  and Aldolase A interaction was  
352 also observed in *S. Typhimurium*-infected macrophages but the frequency of puncta  
353 per cell reduced after 4h of infection compared to 30 min (**Figures 6E and 6F**). Total  
354 levels of aldolase A also showed a modest increase in macrophages upon

355 *S. Typhimurium* infection (**Figure 6G**). Since we observed that the reduction in the  
356 recruitment of aldolase A on to bead or *S. Typhimurium*-containing phagolysosomes  
357 correlated with the decrease in phagosome acidification, we sought to determine if  
358 aldolase A played a role in the regulation of phagolysosome acidification. Short  
359 interfering RNA (siRNA)-mediated knockdown (KD) of Aldolase A in BMDMs  
360 (**Figure 6H**) significantly reduced phagosomal acidification as indicated by reduced  
361 pHrodo fluorescence in aldolase A-depleted BMDMs (**Figure 6I**). As a direct  
362 consequence of reduced phagosome acidification, Aldolase A depletion also  
363 significantly inhibited phagosomal processing as evident from increased number of  
364 intracellular *S. Typhimurium* after 24h of infection (**Figure 6J**). Taken together, our  
365 data signifies the roles of glycolysis and glycolytic enzyme aldolase A in the assembly  
366 of v-ATPase, vacuolar acidification and clearance of intracellular bacteria (**Figure 7**).

367

## 368 **Discussion**

369 Upon pro-inflammatory stimuli, macrophages undergo metabolic  
370 reprogramming as part of an innate immune response. In this study, we deciphered that  
371 *S. Typhimurium* down regulates glycolysis, which is critical for phagolysosomal  
372 function and antigen-presentation in macrophages. We further demonstrate that  
373 glycolysis is required for the assembly of v-ATPase complex on phagosomes and  
374 acidification of phagosomes, which is coordinated by aldolase A.

375 An orchestrated and effective immune response requires high levels of ATP and  
376 biomolecules. However, sites of infection are often poor in oxygen and nutrients. It has  
377 become evident that, macrophages and dendritic cells undergo a metabolic shift similar  
378 to the Warburg-effect observed in cancer cells when pattern recognition receptors are  
379 activated to meet the high-energy demand (29). Similarly, intracellular pathogens have

380 to adapt in order to survive in the hostile intracellular milieu, which requires altering  
381 the metabolic environment to its advantage. In this regard, it is interesting to note that  
382 pathogenicity of *Mycobacterium tuberculosis* has been linked to its ability to modulate  
383 cellular metabolism (30). *S. Typhimurium* is a facultative intracellular pathogen that is  
384 known to alter mitochondrial metabolism in host cells and reduce ATP production (14,  
385 31-33). However, the specific regulation of host metabolic pathways and its interplay  
386 with innate immune mechanisms upon *S. Typhimurium* infection remain unknown. Our  
387 metabolomics and transcriptomics analysis converged in revealing that the central-  
388 carbon-metabolism pathways contributing to ATP generation in macrophages, namely  
389 glycolysis, the TCA cycle and the mitochondrial electron transport chain, were  
390 markedly down regulated upon infection with *S. Typhimurium*. Our results are in  
391 agreement with previous microarray analysis conducted on colon mucosa and liver of  
392 *S. Typhimurium*-infected mice, where a decline in OXPHOS and carbohydrate  
393 metabolism together with decreased levels of hormones regulating the metabolic  
394 pathways have been reported (34, 35). Furthermore, down regulation of these metabolic  
395 pathways is consistent with the previously reported necrotic cell death and ATP  
396 depletion induced by *S. Typhimurium* (36). Additionally, *S. Typhimurium*-mediated  
397 down regulation of glycolytic metabolites could be a direct effect of bacterial  
398 metabolism, since *S. Typhimurium* in macrophages has been shown to rely on  
399 glycolysis for its replication, reducing the availability of glucose in the host cytosol  
400 (13). Taken together, our results highlight glycolysis as a key target of *S. Typhimurium*  
401 during its interplay with host cells.

402 Emerging evidence suggests that Warburg effect-like metabolic shift observed  
403 in macrophages fuel inflammatory responses when exposed to TLR agonists (37). The  
404 metabolic shift towards glycolytic flux fuels both the TCA cycle and the pentose

405 phosphate pathway (PPP) thus providing a double impact on the innate immune defense  
406 mechanisms. On the one hand, increased production of NADPH by the PPP results in  
407 ROS-mediated inflammation as a consequence of the transfer of electrons from  
408 NADPH to NADPH-oxidase (38). Metabolites such as succinate derived from TCA  
409 cycle have also been shown to induce IL-1 $\beta$  in a HIF-1 $\alpha$ -dependent manner in  
410 macrophages stimulated with LPS (11). In contrast, our data indicate that  
411 *S. Typhimurium*-induced inflammation is independent of these metabolic mechanisms  
412 since levels of ribose-5-phosphate (PPP), and succinate (TCA cycle) declined.  
413 Moreover, inhibition of glycolysis further enhanced inflammatory cytokine secretion  
414 in *S. Typhimurium*-infected macrophages. Our data corroborates with the report that  
415 *S. Typhimurium* disrupts glycolysis to induce inflammasome-mediated inflammation  
416 (39). Therefore, we propose that *S. Typhimurium* inhibits glycolysis to evade  
417 phagosomal clearance leading to the activation of canonical inflammatory pathways.

418 A predominant function of macrophages is to phagocytose invading pathogens  
419 and eliminate them in phagolysosomes. Previous reports have shown that  
420 *S. Typhimurium* prevents fusion of lysosomes with bacteria-containing phagosomes  
421 (40). Contradictorily, several other studies have shown that *S. Typhimurium*-containing  
422 vacuoles (SCVs) are accessible to lysosomal markers and they fuse with lysosomes  
423 (41)(42). This paradox could be clarified by our findings, which show that  
424 macrophages initially upregulate glycolytic machinery to enhance acidification of the  
425 phagosomes and acquire late endosomal properties. However, *S. Typhimurium* uses the  
426 phagosomal acidic environment to express its SPI-2-encoded virulence factors (43) and  
427 inhibit phagosome maturation. This is evident from a rapid increase in Glut1 expression  
428 and glucose import followed by a marked reduction at the later phase of infection.  
429 Interestingly, we also observed that the reduction in glucose import and acidification of

430 phagosomes is virulence associate and is partially SPI-I-dependent as the  
431 *S. Typhimurium* mutant *invA* did not abrogate glycolysis as that of the WT bacteria  
432 (**Figures 2G-2H**). Our findings clearly demonstrate that reduced glycolysis due to  
433 deficient insulin signaling or feeding cells with 2-DG leads to increased bacterial  
434 replication *in vitro* and *in vivo*. Accordingly, up regulation of glycolysis using 4-OHT  
435 starkly reduced bacterial burden in BMDMs and *in vivo*. These results indicate that  
436 metabolism is intricately linked to phagosomal functions in macrophages. Our  
437 investigations using inert biological particles and beads coated with substrates for  
438 various lysosomal enzymes reveal a general cellular mechanism that glycolysis  
439 regulates the activity of lysosomal enzymes. *S. Typhimurium*-mediated inhibition of  
440 glycolysis also reduced the processing and presentation of OVA peptides on MHC  
441 molecules. This is consistent with our previous report that *S. Typhimurium*-infected  
442 antigen presenting cells lack antigen presentation ability (44). Interestingly, both the  
443 processing of antigens and the activation of MHC II (cleavage of the invariant chain)  
444 are pH-dependent (45).

445         Acidification of the phagosomes is a prerequisite for the degradative function,  
446 because lysosomal enzymes require acidic pH for their optimal activity. Acidification  
447 is also required for the interaction with endocytic vesicles and the maturation of  
448 phagosomes themselves (46). Metabolic intermediates such as ROS catalyzed by  
449 NADPH-oxidase and generated in mitochondria juxtaposed to pathogen containing  
450 phagosomes (47) and NADH-dependent NO production by iNOS (48) have been shown  
451 to facilitate the bactericidal activity of phagolysosomes. Production of these metabolic  
452 intermediates also requires protons generated by v-ATPase complex. Acidification of  
453 phagosomes is regulated by the multimeric complex v-ATPase and is critical for the  
454 maturation of phagosomes, fusion of lysosome with phagosomes and the activity of

455 lysosomal enzymes (49, 50). Since we observed defects in phagosome maturation in  
456 glycolysis-deficient macrophages, we reasoned that glycolysis could be involved in the  
457 acidification of phagosomes. As expected, under conditions of reduced glycolytic flux,  
458 acidification of phagosomes containing inert biological particles was significantly  
459 reduced, which is a result of defective assembly of  $V_0$  and  $V_1$  on phagosomes. Our  
460 study thus suggests that *S. Typhimurium* mediated down regulation of glycolysis  
461 prevents acidification of the pathogen-containing phagosomes by hampering the  
462 assembly of  $V_0$  and  $V_1$  on the phagosomes. This is consistent with a previous report  
463 demonstrating that high glucose availability facilitates the assembly of v-ATPase thus  
464 enabling increased entry of influenza virus (51). However, the mechanism remains  
465 poorly characterized.

466 We found that glycolytic enzymes were downregulated when glucose intake  
467 was reduced by *S. Typhimurium* infection, indicating that the import of glucose could  
468 be an additional mechanism regulating the expression of glycolytic enzymes.  
469 Consistently, we observed a decrease in MondoA over time, a glucose-induced  
470 transcription factor responsible for the transcriptional regulation of enzymes involved  
471 in carbohydrate catabolism, including glycolysis and PPP (52). Glycolytic enzymes are  
472 also known to perform multifaceted non-glycolytic functions such as transcriptional  
473 regulation (53), cell motility and regulation of apoptosis (54). Glycolytic enzymes such  
474 as aldolase and PFK have been directly implicated in the assembly of v-ATPase (27,  
475 28). Future studies on the specific roles of different glycolytic enzymes in the regulation  
476 of phagosomes will be valuable in understanding the process of phagosome maturation  
477 and will expand its role in linking innate and adaptive immunity.

478 Taken together, our findings convincingly demonstrate that glycolysis critically  
479 regulates the phagolysosomal activity of macrophages, which is evaded by

480 *S. Typhimurium*. Conceivably, in pathological conditions such as diabetes wherein  
481 cells are insensitive to insulin, patients become increasingly susceptible to infections  
482 because macrophages will be inefficient in eliminating pathogens as a result of reduced  
483 glycolysis. Furthermore, the significance of glycolysis in antigen processing and  
484 presentation could be applied in designing adjuvants for vaccines. Finally, increase in  
485 antimicrobial properties of macrophages upon 4-OHT treatment suggests an alternate  
486 approach to control drug-resistant pathogens.

487

## 488 **Experimental Procedures**

### 489 **Ethics statement**

490 All animal procedures were in accordance with institutional guidelines on animal  
491 welfare and were approved by the North Rhine-Westphalian State Agency for Nature,  
492 Environment, and Consumer Protection [Landesamt für Natur, Umwelt and  
493 Verbraucherschutz (LANUV) Nordrhein-Westfalen; File no: 84-02.05.40.14.082 and  
494 84-02.04.2015.A443] and the University of Cologne.

495

### 496 **Preparation of bacteria**

497 Bacteria from a single colony was inoculated into 5 mL of BHI medium and incubated  
498 overnight at 37°C with constant agitation. Next, 1 mL of bacteria suspension was  
499 transferred into 50 mL of BHI and grown until OD<sub>600</sub>:1 (logarithmic growth phase).  
500 Concentration of bacteria was estimated by plating serial dilutions on BHI agar plates.  
501 When indicated, *S. Typhimurium* was inactivated for 10 min at 95° C.

502

### 503 **Cell culture and bacterial infection**



504 Bone marrow was extracted from femur of 8-12 weeks old female wild-type (WT)  
505 C57BL/6 mice (Charles River Laboratories) or insulin receptor knockout (IR<sup>Δmyel</sup>) mice  
506 (provided by Jens Brüning, MPI for Metabolism and Ageing, Cologne, Germany).  
507 Bone marrow was differentiated into macrophages for 7 days in RPMI medium  
508 supplemented with 20% L929 supernatant and 10% fetal bovine serum (FBS). Bone  
509 marrow derived macrophages (BMDMs) were infected with *Salmonella* Typhimurium  
510 SL1344 or *S. aureus* or *L. monocytogenes* at a multiplicity of infection (MOI) of 10.  
511 After infection, BMDMs were incubated with the bacteria for 10 min at RT and 30 min  
512 at 37°C. This incubation time was sufficient for bacteria to be internalized by  
513 macrophages as confirmed by microscopy analysis. Cells were then washed with  
514 medium containing 50 µg/ml of gentamicin and incubated in medium with 50 µg/ml of  
515 gentamicin. After 2h, the concentration of gentamycin was reduced to 10 µg/ml.  
516 BMDMs were treated with 1 mM 2-DG (Life Technologies) dissolved in medium  
517 without glucose for 2h prior to infection, 1 µM 4-hydroxytamoxifen (4-OHT; Sigma)  
518 for 1h at 37°C prior to infection and during the course of infection, oligomycin (Sigma)  
519 2 µg/ml for 30 min prior to infection, pyruvate 1mM for 2h prior to infection or with *S.*  
520 Typhimurium LPS (Sigma) 100 ng/ml for the indicated times.

521

## 522 **Global metabolomics analysis**

523 1x10<sup>6</sup> cells per sample were taken for metabolomics analysis. Trypsinized cells were  
524 washed twice with PBS buffer and then with deionized water for few seconds.  
525 Subsequently, cells were quickly quenched in liquid nitrogen and stored at -80°C until  
526 further analysis. Frozen cell samples were thawed step wise at -20°C and 4°C and then  
527 metabolites were extracted by adding 20 µl of labeled internal standard mix and 1 ml  
528 of cold extraction solvent (90/10 ACN/H<sub>2</sub>O + 1% FA). Cells were then vortexed for 30

529 sec, sonicated for 30 sec in three cycles, and incubated on ice for 10 min. After the  
530 centrifugation at 14000 rpm for 15 min at 4°C, 800 µl of supernatants were aspirated  
531 into Eppendorf tubes. The collected extracts were dispensed in Ostro™ 96-well plate  
532 (Waters Corporation, Milford, USA) and filtered by applying vacuum at a delta  
533 pressure of 300-400mbar for 2.5 min on robot's vacuum station. The clean extract was  
534 collected to a 96-well collection plate, placed under Ostro™ plate. The collection plate  
535 was sealed and centrifuged for 15 min, 4000 rpm, 4°C and placed in auto-sampler of  
536 the liquid chromatography system for the injection. Isotopically labeled internal  
537 standards were obtained from Cambridge Isotope Laboratory, Inc., USA (Table S1).  
538 Instrument parameters, analytical conditions and data analysis were performed as  
539 previously described (55). Metabolomics data analysis was carried out using a web-  
540 based comprehensive metabolomics data processing tool, MetaboAnalyst 3.0 (56).  
541 Log-transformed and auto scaled data i.e., mean-centered and divided by the standard  
542 deviation of each variable, was used for various data analysis. t-test for unequal  
543 variances (Welch's t-test) was applied by default to every compound.

544

#### 545 **RNA-sequencing**

546 Total RNA from *S. Typhimurium*-infected BMDMs was extracted 2 h post infection  
547 using the Qiagen RNeasy kit and cDNA was synthesized with SuperScript III (Life  
548 Technologies) following the manufacturer's instructions. For Illumina sequencing,  
549 libraries were prepared from total RNA with Ribo-Zero treatment according to the  
550 manufacturer's instructions. The analysis was carried out using the standardized RNA-  
551 Seq workflow on the QuickNGS platform (57). In brief, reads were aligned to the  
552 GRCm38 (mm10) build of the mouse genome using TopHat2 (58) and FPKM values  
553 were computed with Cufflinks (59). The sequence data has been submitted to GEO

554 repository and can be accessed using the accession number GSE84375. Differential  
555 gene expression analysis was carried out using DEseq2 (60) on the raw read counts  
556 based on release 82 of the Ensembl database. Finally, genes were selected according to  
557 a threshold of 2 for the fold change and 0.05 for the p-value.

558

### 559 **Analysis of glycolytic metabolites**<sup>[SEP]</sup>

560 Metabolites pertaining to glycolysis were analyzed with the assistance of Metabolomic  
561 Discoveries, Berlin, Germany. At the indicated time points post infection, BMDMs  
562 were washed with cold 0.9% NaCl and cells were collected in extraction buffer  
563 provided by Metabolomic Discoveries. Samples were snap frozen and sent to  
564 Metabolomic Discoveries. Derivatization and analysis of metabolites by a GC-MS  
565 7890A mass spectrometer (Agilent, Santa Clara, USA) were carried out as described  
566 (45). Metabolites were identified in comparison to Metabolomic Discoveries database  
567 entries of authentic standards. The LC separation was performed using hydrophilic  
568 interaction chromatography with a ZIC-HILIC 3.5 $\mu$ m, 200A column (Merck Sequant,  
569 Umeå Sweden), operated by an Agilent 1290 UPLC system (Agilent, Santa Clara,  
570 USA). The LC mobile phase was A) 95% acetonitrile; 5% 10 mM ammonium acetate  
571 and B) 95% 10mM ammonium acetate; 5% acetonitrile with a gradient from 95 % A to  
572 72 % A at 7 min, to 5% at 8 min, followed by 3 min wash with 5% A. The flow rate  
573 was 400 $\mu$ l/min, injection volume 1  $\mu$ l. Mass spectrometry was performed using a 6540  
574 QTOF/MS Detector and an AJS ESI source (Agilent, Santa Clara, USA). The measured  
575 metabolite intensities were normalized to internal standards.

576

### 577 **Glucose uptake assay**

578 After 0, 0.5, 1 or 2 h post-infection, RPMI medium containing glucose was replaced  
579 with medium without glucose supplemented with 10  $\mu$ M of the fluorescent glucose  
580 analogue 2-NBDG (Life Technologies). After 30 min of incubation at 37°C, cells were  
581 washed with PBS and resuspended in 1% formaldehyde for FACS analysis. FACS  
582 Canto (BD biosciences) flow cytometer was used for the acquisition of samples and  
583 Flowjo software (Flowjo LLC) was used for data analysis.

584

#### 585 **Extracellular acidification rate measurement (Seahorse)**

586 Extracellular acidification rate (ECAR) was analyzed using a XF96 Extracellular Flux  
587 Analyzer (Seahorse Bioscience). BMDMs were infected with *S. Typhimurium* with a  
588 MOI of 10 plated in non-buffered media. Measurements were obtained under basal  
589 conditions.

590

#### 591 **Phagosomal $\beta$ -galactosidase activity assay**

592 To assess the  $\beta$ -galactosidase activity in phagolysosomes, red fluorescent beads (Bangs  
593 Laboratories) were coated with 5-Dodecanoylamino fluorescein Di- $\beta$ -D-  
594 Galactopyranoside (C<sub>12</sub>FDG, Life Technologies) for 60 min at 37°C in NaHCO<sub>3</sub> pH  
595 9.6 buffer. 100 beads per cell were added to BMDMs and incubated for 10 min at RT  
596 and 10 min at 37°C, followed by washings with RPMI to remove extracellular beads.  
597 After 0h, 0.5h, 1h or 2h, cells were washed with cold PBS and resuspended in 1%  
598 formaldehyde. Samples were acquired in a FACSCanto flow cytometer and Flowjo  
599 software. Mean fluorescence intensity (MFI) of C<sub>12</sub>FDG was normalized to the red MFI  
600 of the beads for every sample.

601

#### 602 **Phagosomal proteolytic activity assay**

603 To assess proteolytic activity in the phagolysosomes, red fluorescent beads were coated  
604 with green DQ-BSA (Life Technologies) dissolved in carbodiimide solution (25  
605 mg/mL in PBS) for 30 min at RT. After washing, beads were resuspended in 0.1 M  
606 sodium tetraborate decahydrate solution (pH: 8.0 in ddH<sub>2</sub>O) and incubated over night  
607 at RT. Beads were then washed, resuspended in RPMI and added to BMDMs at  
608 100beads/cell. After 10min incubation at RT and 10min incubation at 37°C, cells were  
609 washed to remove non-internalized beads. After 0, 0.5, 1 or 2h, cells were washed with  
610 cold PBS and resuspended in 1% formaldehyde. Samples were acquired using a BD  
611 FACSCanto flow cytometer and Flowjo software. DQ-BSA MFI was normalized to  
612 the red MFI of beads for every sample.

613

#### 614 **Phagosomal acidification**

615 Phagosome acidification was analyzed using the pH-sensitive fluorescent pHrodo  
616 Green conjugated *E. coli* Bioparticles (Life Technologies). These particles were first  
617 coated with the pH-insensitive dye Alexa Fluor-647 (Life Technologies) for 1 h at 37°C  
618 in 0.1M sodium tetra borate decahydrate (pH: 8.0 in ddH<sub>2</sub>O). Beads were then washed,  
619 resuspended in RPMI with 10 % FBS and added to the cells (100 bioparticles per  
620 sample). After 10 min incubation at RT and 10 min incubation at 37°C, cells were  
621 washed to remove non-internalized bioparticles. After 0h, 0.5h, 1h or 2h, cells were  
622 washed with cold PBS and resuspended in 1% formaldehyde. Fluorescent signal was  
623 analyzed using a FACSCanto flow cytometer and Flowjo software. pHrodo MFI was  
624 normalized to the Alexa-647 MFI for every sample.

625

#### 626 **Antigen presentation assay**

627 Treated BMDMs were incubated with Fc receptor blocking reagent TruStain fcX  
628 (Biolegend) for 5 min on ice and then incubated for 30 min on ice with an antibody  
629 specific for MHC class II or OVA<sub>323-339</sub>-MHC II complexes in PBS with 3% FBS  
630 solution. After washing, cells were resuspended in 1% formaldehyde in PBS and  
631 samples were acquired using a BD FACSCanto flow cytometer and analyzed using  
632 Flowjo software.

633

#### 634 **OVA processing assay**

635 Octadecyl C18 1 $\mu$ m magnetic beads (SiMAG, Chemicell) were coated with Alexa647-  
636 OVA (Life Technologies) in acetate buffer pH: 5.0 for 2 h at RT. After washing, beads  
637 were added to treated or infected BMDMs with a ratio of 300 beads per cell. After 24  
638 h, cells were lysed, and Alexa647-OVA-coated magnetic beads were extracted as  
639 described above for the isolation of bead phagosomes. Isolated phagosomes were then  
640 resuspended in 1% formaldehyde (in PBS) and Alexa647-OVA signal was acquired  
641 and analyzed using a FACSCanto flow cytometer and Flowjo software respectively.

642

#### 643 **Isolation of bead-containing phagosomes**

644 BMDMs were incubated with Octadecyl C18 1  $\mu$ m magnetic beads (SiMAG,  
645 Chemicell; 300 beads per cell) for 10 min at RT and for 10 min at 37°C. At each time  
646 point, cells were washed with PBS and Equilibration buffer (50 mM PIPES pH: 7.0, 50  
647 mM MgCl<sub>2</sub>, 5 mM EGTA, 1 mM DTT, 10  $\mu$ M cytochalasin and protease/phosphatase  
648 inhibitor cocktail) was added. Cells were incubated on ice for 20 min and samples were  
649 lysed (50 mM PIPES pH: 7.0, 50 mM MgCl<sub>2</sub>, 5 mM EGTA and 68mM sucrose). Cells  
650 were scrapped out and passed through a 26G needle at least 15 times. Bead-containing  
651 phagosomes were then separated from the lysate using a magnet.

652 **Isolation of *S. Typhimurium*-containing phagosomes**

653 *S. Typhimurium*-containing phagosomes were isolated as described before (61).  
654 *S. Typhimurium* was grown in BHI broth until OD<sub>600</sub>:1 and then biotinylated with EZ-  
655 link NHS-Biotin reagent (Thermo Fisher Scientific). After washing, biotinylated  
656 bacteria were incubated with siMAG Streptavidin ferrofluid (Chemicell). Biotinylated  
657 *S. Typhimurium* bound to the Streptavidin ferrofluid was then separated using a magnet  
658 and bacteria were quantified using BHI agar plates. Subsequently, BMDMs were  
659 infected with biotinylated *S. Typhimurium* bound to the Streptavidin ferrofluid at an  
660 MOI of 10. At each time point, *S. Typhimurium*-containing phagosomes were isolated  
661 using equilibration and lysis buffer as described for bead-containing phagosome  
662 isolation.

663

664 ***In vitro* bacterial burden and ELISA**

665 After 0 and 24h post-infection, BMDMs were lysed with 1% Triton X-100, 0.01% SDS  
666 in PBS. Several dilutions of the lysate were plated on BHI plates and incubated over  
667 night at 37°C. Next day, *S. Typhimurium* colony forming units (CFU) were  
668 enumerated. Supernatants were collected and analyzed for IL-6 and TNF $\alpha$  secretion  
669 using ELISA kit (R&D) according to the manufacturer's instructions.

670

671 **Estimation of bacterial burden *in vivo***

672 Mice were infected with 100 CFU of *S. Typhimurium* per mouse by i.v. injection. After  
673 3 days of infection mice were euthanized according to current ethical protocols. Liver  
674 was isolated and homogenized using gentleMACS Dissociator (Miltenyi Biotec) in  
675 sterile PBS. Extracts of the homogenized livers were plated on BHI Agar plates. After  
676 24 h incubation at 37°C, bacterial colonies were enumerated. Number of colonies was

677 normalized to per gram of tissue. Mice were injected with 4-OHT intraperitoneally one  
678 day before the infection with *S. Typhimurium* and every day during the course of  
679 infection until the mice were sacrificed for analysis.

680

### 681 **Immunoblot analysis**

682 BMDMs were lysed in RIPA buffer supplemented with 1X protease/phosphatase  
683 inhibitor cocktail (Thermo Fisher Scientific). Protein was estimated using Pierce®  
684 BCA Protein Assay Kit (Thermo Fisher Scientific) according to the manufacturer's  
685 instructions. Equal amount of proteins was separated in 10% or 12% SDS-PAGE gels.  
686 Proteins were then transferred onto a PVDF membrane and probed with antibodies  
687 against Glut1 (sc-7903, Santa Cruz Biotechnology), Enolase (sc-31859, Santa Cruz  
688 Biotechnology), HKX-2 (sc-6521, Santa Cruz Biotechnology), v-ATPase A1 (V<sub>0</sub>  
689 subunit, sc-28801, Santa Cruz Biotechnology), v-ATPase b1/2 (V<sub>1</sub> subunit, sc-21209,  
690 Santa Cruz Biotechnology), H2-I/Abβ (sc-71201, Santa Cruz Biotechnology),  
691 phospho-p38 (#9216, Cell Signaling), p38 (#9212, Cell Signaling), phospho-p65  
692 (#3033, Cell Signaling), p65 (#4764, Cell Signaling), HIF1α (NB100-105, Abcam),  
693 MondoA (SAB2104303, Sigma-Aldrich), calnexin (sc-11397, Santa Cruz  
694 Biotechnology) or β-actin (sc-47778, Santa Cruz Biotechnology). Either calnexin or β-  
695 actin was used as loading control. After incubation with secondary HRP-conjugated  
696 antibody (R&D) blots were developed using ECL reagent (GE Healthcare).

697

### 698 **Immunoprecipitation and Native PAGE**

699 Bead phagosomes were isolated from 2-DG-pre-treated BMDMs as described above  
700 and were lysed with radio-immunoprecipitation assay (RIPA) buffer containing  
701 protease and phosphatase inhibitors. After preclearing the cell lysate with protein A/G



702 agarose magnetic beads (#16-663, Millipore) for 1 h, beads were removed by placing  
703 the tube on a magnetic rack. The whole cell lysate (approximately 500  $\mu$ g of protein)  
704 was incubated with 4  $\mu$ g of an antibody against  $V_0$  subunit-*a* overnight at 4°C. A  
705 separate sample was incubated with IgG which served as a control. Protein A/G agarose  
706 beads were added again and incubated for an additional 1 h at room temperature. The  
707 immunoprecipitated proteins along with the agarose beads were collected by placing  
708 the tube on a magnetic rack. The collected beads were washed several times with RIPA  
709 buffer. The washed samples were mixed with SDS-PAGE sample loading buffer, boiled  
710 and resolved on a 10% SDS-polyacrylamide gel.  $V_1$  subunit B immunoprecipitated  
711 along with  $V_0$  was identified by Western blot analysis.

712 To perform Native-PAGE, equal amounts of total protein per sample were  
713 mixed with NativePAGE™ Sample Buffer (Life Technologies) and Triton X-100 (final  
714 concentration of 0.5%). Sample proteins were separated according to their masses on a  
715 3.5 to 16% linear gradient acrylamide gel by electrophoresis. After separation, proteins  
716 were transferred to a PVDF membrane. Following blocking, membrane was incubated  
717 with antibodies directed against the cytosolic subunit of the v-ATPase (anti-vATPase-  
718  $V_1$  subunit B) or against the membrane subunit of the v-ATPase (anti-vATPase- $V_0$   
719 subunit *a*).

720

## 721 **Statistical analysis**

722 Statistical analysis was performed using Graphpad Prism software. Two-tailed  
723 Student's *t*-test was conducted for most of the datasets unless specified otherwise to  
724 determine statistical significance. All data are represented as mean  $\pm$  SEM as indicated.  
725 For all tests, *p*-values <0.05 was considered statistically significant (\**p*<0.05;  
726 \*\**p*<0.01; \*\*\**p*<0.005).

727

728 **Author Contributions**

729 Conceptualization: N.R., and S.G; Methodology: S.G., R.G., A.P., P.F., V.R.V., N.R.,  
730 Investigation and Intellectual Input: S.G., J.F., R.G., M.W., A.P., G.C and N.R.;  
731 Writing Original Draft: S.G., and N.R.; Writing Review & Editing: P.F., V.R.V., G.C  
732 and N.R.; Funding Acquisition: N.R.; Resources: N.R., V.R.V: Supervision: V.R.V and  
733 N.R.

734

735 **Acknowledgements**

736 This work was supported by funding to NR from Cologne Excellence Cluster on  
737 Cellular Stress Responses in Aging-Associated Diseases (CECAD; funded by the DFG  
738 within the Excellence Initiative by the German federal and state governments) Köln  
739 Fortune and grants from Deutsche Forschungsgemeinschaft (SFB 670) to NR. We  
740 thank Adam Antebi and Nina J. Hos for critically reading the manuscript.

741

742

743

744

745

746

747

748

749

750

751

## 752 References

- 753 1. Ginhoux F, Schultze JL, Murray PJ, Ochando J, & Biswas SK (2016) New  
754 insights into the multidimensional concept of macrophage ontogeny,  
755 activation and function. *Nat Immunol* 17(1):34-40.
- 756 2. Robinson N, *et al.* (2012) Type I interferon induces necroptosis in  
757 macrophages during infection with *Salmonella enterica* serovar  
758 Typhimurium. *Nature immunology* 13(10):954-962.
- 759 3. Zhang DW, *et al.* (2009) RIP3, an energy metabolism regulator that  
760 switches TNF-induced cell death from apoptosis to necrosis. *Science*  
761 325(5938):332-336.
- 762 4. Delmastro-Greenwood MM & Piganelli JD (2013) Changing the energy of  
763 an immune response. *Am J Clin Exp Immunol* 2(1):30-54.
- 764 5. Krawczyk CM, *et al.* (2010) Toll-like receptor-induced changes in glycolytic  
765 metabolism regulate dendritic cell activation. *Blood* 115(23):4742-4749.
- 766 6. Galvan-Pena S & O'Neill LA (2014) Metabolic reprogramming in macrophage  
767 polarization. *Front Immunol* 5:420.
- 768 7. Rodriguez-Prados JC, *et al.* (2010) Substrate Fate in Activated  
769 Macrophages: A Comparison between Innate, Classic, and Alternative  
770 Activation. *J Immunol* 185(1):605-614.
- 771 8. Huang SCC, *et al.* (2014) Cell-intrinsic lysosomal lipolysis is essential for  
772 alternative activation of macrophages. *Nat Immunol* 15(9):846-855.
- 773 9. Kornberg MD, *et al.* (2018) Dimethyl fumarate targets GAPDH and aerobic  
774 glycolysis to modulate immunity. *Science* 360(6387):449-453.
- 775 10. Mills EL, *et al.* (2018) Itaconate is an anti-inflammatory metabolite that  
776 activates Nrf2 via alkylation of KEAP1. *Nature* 556(7699):113-117.
- 777 11. Tannahill GM, *et al.* (2013) Succinate is an inflammatory signal that induces  
778 IL-1 beta through HIF-1 alpha. *Nature* 496(7444):238-+.
- 779 12. Eisele NA, *et al.* (2013) *Salmonella* Require the Fatty Acid Regulator PPAR  
780 delta for the Establishment of a Metabolic Environment Essential for Long-  
781 Term Persistence. *Cell Host Microbe* 14(2):171-182.
- 782 13. Bowden SD, Rowley G, Hinton JC, & Thompson A (2009) Glucose and  
783 glycolysis are required for the successful infection of macrophages and  
784 mice by *Salmonella enterica* serovar typhimurium. *Infect Immun*  
785 77(7):3117-3126.
- 786 14. Ganesan R, *et al.* (2017) *Salmonella* Typhimurium disrupts Sirt1/AMPK  
787 checkpoint control of mTOR to impair autophagy. *PLoS pathogens*  
788 13(2):e1006227.
- 789 15. Fischer J, *et al.* (2019) Leptin signaling impairs macrophage defenses  
790 against *Salmonella* Typhimurium. *Proceedings of the National Academy of*  
791 *Sciences of the United States of America* 116(33):16551-16560.
- 792 16. Galic S, Sachithanandan N, Kay TW, & Steinberg GR (2014) Suppressor of  
793 cytokine signalling (SOCS) proteins as guardians of inflammatory  
794 responses critical for regulating insulin sensitivity. *Biochem J* 461(2):177-  
795 188.
- 796 17. Weng LP, Smith WM, Brown JL, & Eng C (2001) PTEN inhibits insulin-  
797 stimulated MEK/MAPK activation and cell growth by blocking IRS-1  
798 phosphorylation and IRS-1/Grb-2/Sos complex formation in a breast  
799 cancer model. *Hum Mol Genet* 10(6):605-616.

- 800 18. Kelly B & O'Neill LA (2015) Metabolic reprogramming in macrophages and  
801 dendritic cells in innate immunity. *Cell Res* 25(7):771-784.
- 802 19. Freemerman AJ, *et al.* (2014) Metabolic reprogramming of macrophages:  
803 glucose transporter 1 (GLUT1)-mediated glucose metabolism drives a  
804 proinflammatory phenotype. *J Biol Chem* 289(11):7884-7896.
- 805 20. Luhrmann A & Haas A (2000) A method to purify bacteria-containing  
806 phagosomes from infected macrophages. *Methods Cell Sci* 22(4):329-341.
- 807 21. Mauer J, *et al.* (2010) Myeloid cell-restricted insulin receptor deficiency  
808 protects against obesity-induced inflammation and systemic insulin  
809 resistance. *Plos Genet* 6(5):e1000938.
- 810 22. Doughty CA, *et al.* (2006) Antigen receptor-mediated changes in glucose  
811 metabolism in B lymphocytes: role of phosphatidylinositol 3-kinase  
812 signaling in the glycolytic control of growth. *Blood* 107(11):4458-4465.
- 813 23. Kohn AD, *et al.* (1998) Construction and characterization of a conditionally  
814 active version of the serine/threonine kinase Akt. *J Biol Chem*  
815 273(19):11937-11943.
- 816 24. Lennon-Dumenil AM, *et al.* (2002) Analysis of protease activity in live  
817 antigen-presenting cells shows regulation of the phagosomal proteolytic  
818 contents during dendritic cell activation. *J Exp Med* 196(4):529-540.
- 819 25. Forgac M (2007) Vacuolar ATPases: rotary proton pumps in physiology  
820 and pathophysiology. *Nat Rev Mol Cell Biol* 8(11):917-929.
- 821 26. Kane PM (1995) Disassembly and reassembly of the yeast vacuolar H(+)-  
822 ATPase in vivo. *J Biol Chem* 270(28):17025-17032.
- 823 27. Lu M, Sautin YY, Holliday LS, & Gluck SL (2004) The glycolytic enzyme  
824 aldolase mediates assembly, expression, and activity of vacuolar H+  
825 ATPase. *The Journal of biological chemistry* 279(10):8732-8739.
- 826 28. Su Y, Zhou A, Al-Lamki RS, & Karet FE (2003) The a-subunit of the V-type  
827 H+ATPase interacts with phosphofructokinase-1 in humans. *The Journal*  
828 *of biological chemistry* 278(22):20013-20018.
- 829 29. O'Neill LA & Pearce EJ (2016) Immunometabolism governs dendritic cell  
830 and macrophage function. *J Exp Med* 213(1):15-23.
- 831 30. Mehrotra P, *et al.* (2014) Pathogenicity of Mycobacterium tuberculosis Is  
832 Expressed by Regulating Metabolic Thresholds of the Host Macrophage.  
833 *Plos Pathog* 10(7).
- 834 31. Hernandez LD, Pypaert M, Flavell RA, & Galan JE (2003) A Salmonella  
835 protein causes macrophage cell death by inducing autophagy. *J Cell Biol*  
836 163(5):1123-1131.
- 837 32. Layton AN, Brown PJ, & Galyov EE (2005) The Salmonella translocated  
838 effector SopA is targeted to the mitochondria of infected cells. *J Bacteriol*  
839 187(10):3565-3571.
- 840 33. Hos NJ, *et al.* (2017) Type I interferon enhances necroptosis of Salmonella  
841 Typhimurium-infected macrophages by impairing antioxidative stress  
842 responses. *The Journal of cell biology* 216(12):4107-4121.
- 843 34. Liu XY, Lu R, Xia YL, & Sun J (2010) Global analysis of the eukaryotic  
844 pathways and networks regulated by Salmonella typhimurium in mouse  
845 intestinal infection in vivo. *Bmc Genomics* 11.
- 846 35. Antunes LCM, *et al.* (2011) Impact of Salmonella Infection on Host  
847 Hormone Metabolism Revealed by Metabolomics. *Infect Immun*  
848 79(4):1759-1769.

- 849 36. Robinson N, *et al.* (2012) Type I interferon induces necroptosis in  
850 macrophages during infection with *Salmonella enterica* serovar  
851 Typhimurium. *Nat Immunol* 13(10):954-962.
- 852 37. Everts B, *et al.* (2014) TLR-driven early glycolytic reprogramming via the  
853 kinases TBK1-IKK epsilon supports the anabolic demands of dendritic cell  
854 activation. *Nat Immunol* 15(4):323-+.
- 855 38. Lambeth JD (2004) NOX enzymes and the biology of reactive oxygen. *Nat*  
856 *Rev Immunol* 4(3):181-189.
- 857 39. Sanman LE, *et al.* (2016) Disruption of glycolytic flux is a signal for  
858 inflammasome signaling and pyroptotic cell death. *Elife* 5:e13663.
- 859 40. Buchmeier NA & Heffron F (1991) Inhibition of Macrophage Phagosome-  
860 Lysosome Fusion by *Salmonella*-Typhimurium. *Infect Immun* 59(7):2232-  
861 2238.
- 862 41. Oh YK, *et al.* (1996) Rapid and complete fusion of macrophage lysosomes  
863 with phagosomes containing *Salmonella typhimurium*. *Infect Immun*  
864 64(9):3877-3883.
- 865 42. Mills SD & Finlay BB (1998) Isolation and characterization of *Salmonella*  
866 typhimurium and *Yersinia pseudotuberculosis*-containing phagosomes  
867 from infected mouse macrophages: Y-pseudotuberculosis traffics to  
868 terminal lysosomes where they are degraded. *Eur J Cell Biol* 77(1):35-47.
- 869 43. Coombes BK, Brown NF, Valdez Y, Brumell JH, & Finlay BB (2004)  
870 Expression and secretion of *Salmonella* pathogenicity island-2 virulence  
871 genes in response to acidification exhibit differential requirements of a  
872 functional type III secretion apparatus and SsaL. *Journal of Biological*  
873 *Chemistry* 279(48):49804-49815.
- 874 44. Albaghdadi H, Robinson N, Finlay B, Krishnan L, & Sad S (2009) Selectively  
875 reduced intracellular proliferation of *Salmonella enterica* serovar  
876 typhimurium within APCs limits antigen presentation and development of  
877 a rapid CD8 T cell response. *J Immunol* 183(6):3778-3787.
- 878 45. Lisek J, Schauer N, Kopka J, Willmitzer L, & Fernie AR (2006) Gas  
879 chromatography mass spectrometry-based metabolite profiling in plants.  
880 *Nat Protoc* 1(1):387-396.
- 881 46. Vieira OV, Botelho RJ, & Grinstein S (2002) Phagosome maturation: aging  
882 gracefully. *The Biochemical journal* 366(Pt 3):689-704.
- 883 47. West AP, *et al.* (2011) TLR signalling augments macrophage bactericidal  
884 activity through mitochondrial ROS. *Nature* 472(7344):476-480.
- 885 48. Chakravorty D & Hensel M (2003) Inducible nitric oxide synthase and  
886 control of intracellular bacterial pathogens. *Microbes Infect* 5(7):621-627.
- 887 49. Sturgillkoszycki S (1994) Lack of Acidification in Mycobacterium  
888 Phagosomes Produced by Exclusion of the Vesicular Proton-ATPase (Vol  
889 263, Pg 678, 1994). *Science* 263(5152):1359-1359.
- 890 50. Nordenfelt P, Grinstein S, Bjorck L, & Tapper H (2012) V-ATPase-mediated  
891 phagosomal acidification is impaired by *Streptococcus pyogenes* through  
892 Mga-regulated surface proteins. *Microbes Infect* 14(14):1319-1329.
- 893 51. Kohio HP & Adamson AL (2013) Glycolytic control of vacuolar-type ATPase  
894 activity: A mechanism to regulate influenza viral infection. *Virology* 444(1-  
895 2):301-309.

- 896 52. Havula E, *et al.* (2013) Mondo/ChREBP-Mlx-Regulated Transcriptional  
897 Network Is Essential for Dietary Sugar Tolerance in *Drosophila*. *Plos Genet*  
898 9(4).
- 899 53. Chang CH, *et al.* (2013) Posttranscriptional control of T cell effector  
900 function by aerobic glycolysis. *Cell* 153(6):1239-1251.
- 901 54. Schindler A & Foley E (2013) Hexokinase 1 blocks apoptotic signals at the  
902 mitochondria. *Cell Signal* 25(12):2685-2692.
- 903 55. Roman-Garcia P, *et al.* (2014) Vitamin B(1)(2)-dependent taurine synthesis  
904 regulates growth and bone mass. *J Clin Invest* 124(7):2988-3002.
- 905 56. Xia J, Sinelnikov IV, Han B, & Wishart DS (2015) MetaboAnalyst 3.0--  
906 making metabolomics more meaningful. *Nucleic Acids Res* 43(W1):W251-  
907 257.
- 908 57. Wagle P, Nikolic M, & Frommolt P (2015) QuickNGS elevates Next-  
909 Generation Sequencing data analysis to a new level of automation. *Bmc*  
910 *Genomics* 16:487.
- 911 58. Kim D, *et al.* (2013) TopHat2: accurate alignment of transcriptomes in the  
912 presence of insertions, deletions and gene fusions. *Genome Biol* 14(4):R36.
- 913 59. Trapnell C, *et al.* (2010) Transcript assembly and quantification by RNA-  
914 Seq reveals unannotated transcripts and isoform switching during cell  
915 differentiation. *Nat Biotechnol* 28(5):511-515.
- 916 60. Love MI, Huber W, & Anders S (2014) Moderated estimation of fold change  
917 and dispersion for RNA-seq data with DESeq2. *Genome Biol* 15(12):550.
- 918 61. Gutierrez S, Wolke M, Plum G, & Robinson N (2017) Isolation of *Salmonella*  
919 typhimurium-containing Phagosomes from Macrophages. *Journal of*  
920 *visualized experiments : JoVE* (128).

922

923

924

925

926

927

928

929

930

931

932

933



934 **Figure Legends**

935 **Figure 1: *S. Typhimurium* infection promotes metabolic reprogramming in**  
936 **macrophages**

937 (A) Heatmap representation of 2-way hierarchical clustering of top-25 altered  
938 metabolites in BMDMs upon *S. Typhimurium* infection (2 h p.i.) (n=6) compared to  
939 uninfected controls (n=5). (B) Metabolic pathway enrichment analysis of metabolomics  
940 data from *S. Typhimurium*-infected BMDMs (2 h p.i) compared to uninfected controls.  
941 (C) Ingenuity pathway analysis of genes differentially expressed in RNA-seq data from  
942 *S. Typhimurium*-infected BMDMs (2h p.i) compared to uninfected controls (n=3). (D)  
943 Relative expression of genes from the insulin-signaling pathway in *S. Typhimurium*-  
944 infected BMDMs (2h p.i.) normalized to uninfected controls (n=3).

945

946 **Figure 2: Virulence dependent inhibition of glycolysis in *S. Typhimurium* infected**  
947 **macrophages**

948 (A) Abundance of glycolytic metabolites in *S. Typhimurium*-infected BMDMs after 1  
949 h and 4 h post infection relative to uninfected (UI) BMDMs (n=6). (B) Extracellular  
950 Acidification Rate (ECAR) in BMDMs upon LPS treatment or S.T infection. Data is  
951 normalized to cell number (n=3). (C) Western blot analysis of Glut1 in  
952 *S. Typhimurium*-infected BMDMs compared to uninfected controls.  $\beta$ -actin was used  
953 as loading control. Image shown is representative of 4 independent experiments. (D)  
954 Immunoblot analysis of MondoA levels in different time points upon *S. Typhimurium*  
955 infection in BMDMs. (E) Immunoblot analysis of HIF-1 $\alpha$  levels in different time points  
956 upon *S. Typhimurium* infection in BMDMs. (F) Kinetics of glucose-uptake (shown as  
957 2-NBDG MFI) in *S. Typhimurium*-infected BMDMs relative to uninfected (UI)  
958 BMDMs analyzed by flow cytometry (n=3). (G) Extracellular Acidification Rate

959 (ECAR) in BMDMs infected with WT *S. Typhimurium*, and *invA* and *ssrB* mutants.  
960 Data is normalized to cell number (n=6). **(H)** Immunoblot analysis of the protein levels  
961 of HK2, Glut1 and Enolase upon infection with WT *S. Typhimurium* or *invA* mutant at  
962 different time points.  $\beta$ -actin was used as a loading control. Data are shown as mean  $\pm$   
963 S.E.M. and statistical significance calculated using student t-test is represented as  
964 \*= $p < 0.05$ ; \*\*= $p < 0.01$ ; \*\*\*= $p < 0.001$ .

965

966 **Figure 3: Macrophages depend on glycolysis for the clearance of intracellular**  
967 **bacteria**

968 **(A)** Bacterial burden expressed as colony forming units (CFU) after 24h of  
969 *S. Typhimurium* infection in 2-DG-treated WT BMDMs compared to untreated (UT)  
970 controls (n=5). **(B)** Intracellular *S. Typhimurium* load in WT and IR <sup>$\Delta$ myel</sup> BMDMs after  
971 24h of infection (n=3). **(C)** *S. Typhimurium* in 4-OHT-treated WT BMDMs compared  
972 to untreated (UT) controls after 24h of infection (n=3). **(D)** *L. monocytogenes* burden  
973 in 2-DG-treated WT BMDMs compared to untreated (UT) controls (n=3). **(E)** *S. aureus*  
974 in 2-DG-treated WT BMDMs compared to untreated (UT) controls (n=3). **(F)** *S. aureus*  
975 in WT and IR <sup>$\Delta$ myel</sup> BMDMs (n=3). **(G)** Bacterial load in livers of WT and IR <sup>$\Delta$ myel</sup> mice  
976 after 3 days of *S. Typhimurium* infection. Data represents 2 experiments with 5 mice  
977 each. **(H)** Bacterial load in livers of 4-OHT-treated mice after 3 days of *S. Typhimurium*  
978 infection compared to untreated controls Data represents 2 experiments with 5 mice  
979 each. **(I)** MFI of OVA<sub>323-339</sub>-MHC II complexes on the surface of WT BMDMs pre-  
980 treated with 2-DG and LPS (n=3). **(J)** MFI of unprocessed Alexa647-labelled OVA in  
981 phagosomes isolated from 2-DG-treated BMDMs analyzed by flow cytometry (n=3).  
982 All samples were pre-stimulated with LPS. **(K)** MFI of unprocessed Alexa647-labelled  
983 OVA in bead containing phagosomes isolated from *S. Typhimurium*-infected BMDMs



984 analyzed by flow cytometry (n=3). Data are shown as mean  $\pm$  S.E.M. and statistical  
985 significance calculated using student t-test and represented as \*=p<0.05; \*\*= p<0.01;  
986 \*\*\*=p<0.001.

987

#### 988 **Figure 4: Glycolysis is essential for phagosome maturation**

989 (A) Flow cytometry analysis of 2-DG pre-treated macrophages pulsed with C<sub>12</sub>FDG-  
990 coated beads (n=3) and (B) DQ-BSA-coated beads (n=3). Bar graphs represent mean  
991 fluorescence intensities (MFI) of C<sub>12</sub>FDG and DQ-BSA normalized to MFI of red  
992 fluorescence. MFI of (C) C<sub>12</sub>FDG and (D) DQ-BSA in WT and IR <sup>$\Delta$ myel</sup> BMDMs  
993 normalized to MFI of red fluorescence (n=3). (E) Flow cytometric analysis of BMDMs  
994 infected with C<sub>12</sub>FDG and Alexa594-coated *S. Typhimurium* for 2h in WT BMDMs.  
995 Bar graphs represent mean MFI of C<sub>12</sub>FDG normalized to MFI of red fluorescence.  
996 Data are representative of at least three independent experiments with 3 replicates each.  
997 Data are shown as mean  $\pm$  S.E.M. and statistical significance calculated using student  
998 t-test is represented as \*=p<0.05; \*\*= p<0.01; \*\*\*=p<0.001.

999

#### 1000 **Figure 5: Glycolysis regulates phagosome acidification and v-ATPase assembly**

1001 (A) MFI of pH-sensitive pHrodo-*E. coli* particles in BMDMs untreated (UT) or pre-  
1002 treated with 2-DG, normalized to Alexa647 MFI (n=3). (B) MFI of pHrodo-*E. coli*  
1003 particles in WT and IR <sup>$\Delta$ myel</sup> BMDMs normalized to Alexa647 MFI (n=3). (C) MFI of  
1004 pHrodo-*E. coli* particles in *S. Typhimurium*-infected WT BMDMs (2h p.i.) normalized  
1005 to Alexa647 MFI (n=3). (D) MFI of pHrodo-*E. coli* particles in 4-OHT-treated  
1006 BMDMs infected with *S. Typhimurium* for 2h normalized to Alexa647 MFI (n=3). (E)  
1007 Expression of v-ATPase subunits (V<sub>0</sub>, V<sub>1</sub>) in isolated bead-containing phagosomes  
1008 from untreated and 2-DG-treated BMDMs. Image shown is representative of 3

1009 individual experiments. **(F)** Immunoblot band intensities were quantified using imageJ  
1010 and the  $V_1/V_0$  ratio was determined and plotted (n=3). **(G)** Expression of v-ATPase  
1011 subunits ( $V_0$ ,  $V_1$ ) in isolated bead phagosomes from WT and IR<sup>Δmyel</sup> BMDMs. **(H)**  
1012 Western blot was quantified and  $V_1/V_0$  ratios are shown. **(I)** Expression of v-ATPase  
1013 subunits ( $V_0$ ,  $V_1$ ) in isolated *S. Typhimurium* phagosomes and cytoplasm. **(J)**  $V_1/V_0$   
1014 ratios were quantified and plotted. **(K)** PLA analysis of v-ATPase subunits  $V_0$  and  $V_1$   
1015 interaction in 2-DG-treated BMDMs using confocal microscopy (scale bars indicate 10  
1016 μm). Image shown is representative of 3 individual experiments. **(L)** Quantification of  
1017  $V_0$  and  $V_1$  interaction in 2-DG treated BMDMs (n=15). **(M)**  $V_0$  subunit *a* was  
1018 immunoprecipitated from isolated *S. Typhimurium* phagosomes and probed for  $V_1$   
1019 subunit B. **(N)** Phagosomes isolated from 2DG-treated and untreated macrophages were  
1020 subjected to Native-PAGE and immunoblotted for v-ATPase subunits  $V_0$  and  $V_1$ .

1021 **Figure 6: Aldolase A critically regulates the assembly of v-ATPase and phagosome**  
1022 **acidification**

1023 **(A)** Confocal microscopy of 2-DG-treated BMDMs pulsed with *E. coli* inert fluorescent  
1024 particles immunostained for aldolase A (green) (scale bars indicate 10μm). Image  
1025 shown is representative of 3 individual experiments. **(B)** Quantification of aldolase A  
1026 co-localization with *E. coli* in 2-DG-treated BMDMs (n=7). **(C)** Confocal microscopy  
1027 of *S. Typhimurium*-infected (S.T., red) BMDMs immunostained for aldolase A (green).  
1028 Image shown is representative of 3 individual experiments. **(D)** PLA analysis of  $V_0$ -  
1029 aldolase A interaction in 2-DG treated BMDMs. Image shown is representative of 3  
1030 individual experiments. **(E)** PLA analysis of  $V_0$ -aldolase A interaction in  
1031 *S. Typhimurium*-infected BMDMs. Image shown is representative of 3 individual  
1032 experiments. **(F)** Quantification of  $V_0$  and aldolase A interaction in *S. Typhimurium*-  
1033 infected BMDMs (n=10). **(G)** Western blot analysis of Aldolase A expression in

1034 BMDMDs infected with *S. Typhimurium* at indicated time points. **(H)** Knockdown of  
1035 *aldolase A* in BMDMs using control siRNA and *aldolase A*-specific siRNA. **(I)** MFI of  
1036 pHrodo-*E. coli* particles in *aldolase A* KD BMDMs normalized to Alexa647 MFI  
1037 analyzed by flow cytometry (n=3). **(J)** Quantification of *S. Typhimurium* cfu in  
1038 *aldolase A* KD macrophages 24h post-infection compared to WT controls (n=3).

1039

1040 **Figure 7: Aldolase A critically regulates the assembly of v-ATPase and phagosome**  
1041 **acidification**

1042 Schematic representation of *S. Typhimurium*-mediated evasion of phagosome  
1043 degradation in macrophages by preventing glycolysis-regulated assembly of the v-  
1044 ATPase.

# Figure-1

## A

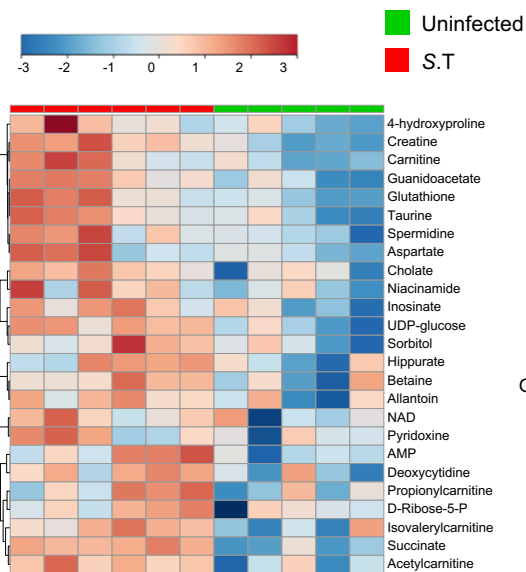

## B

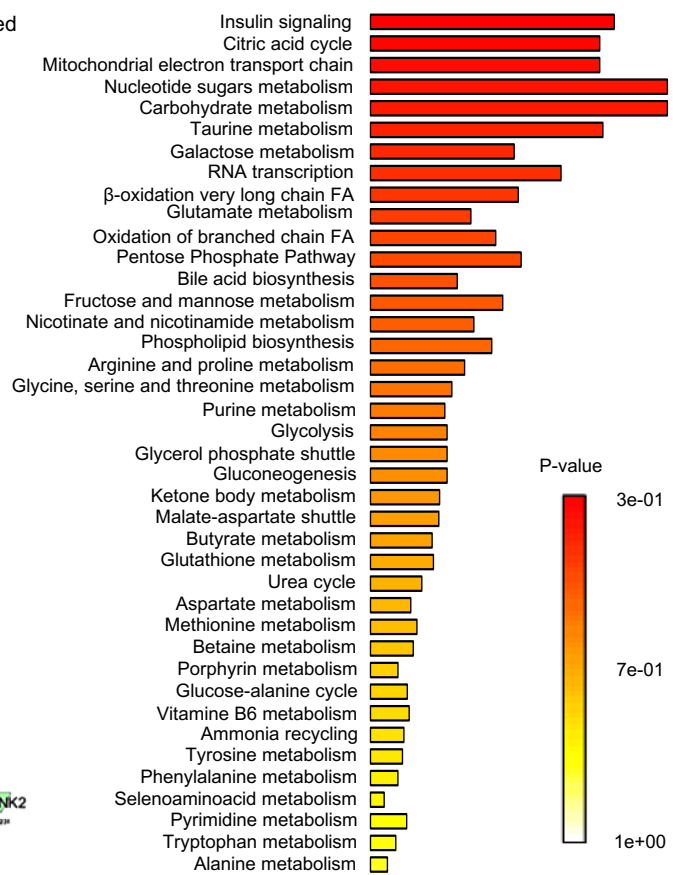

## C

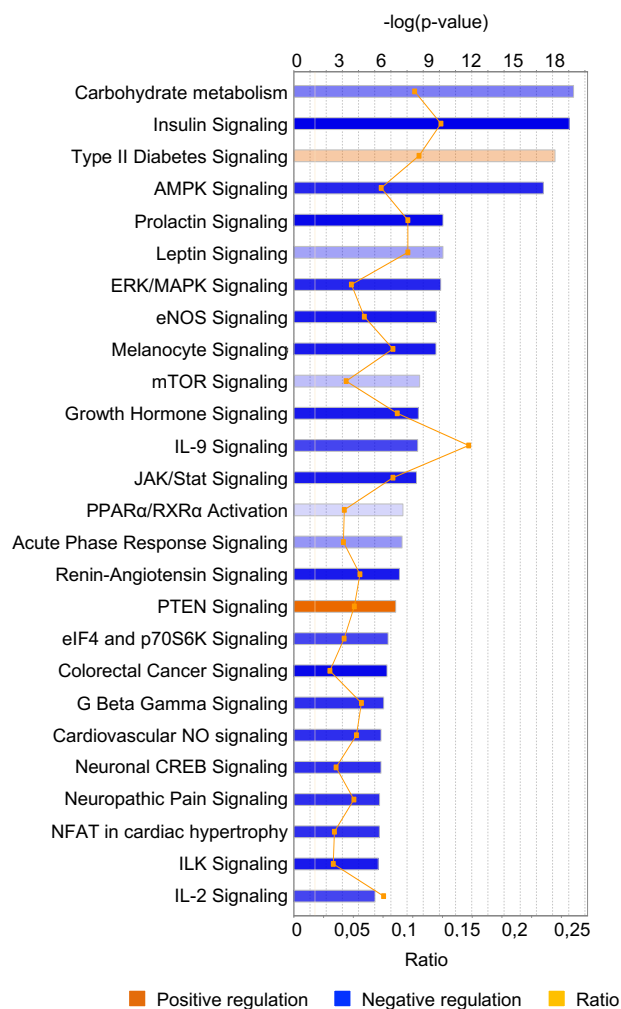

## D

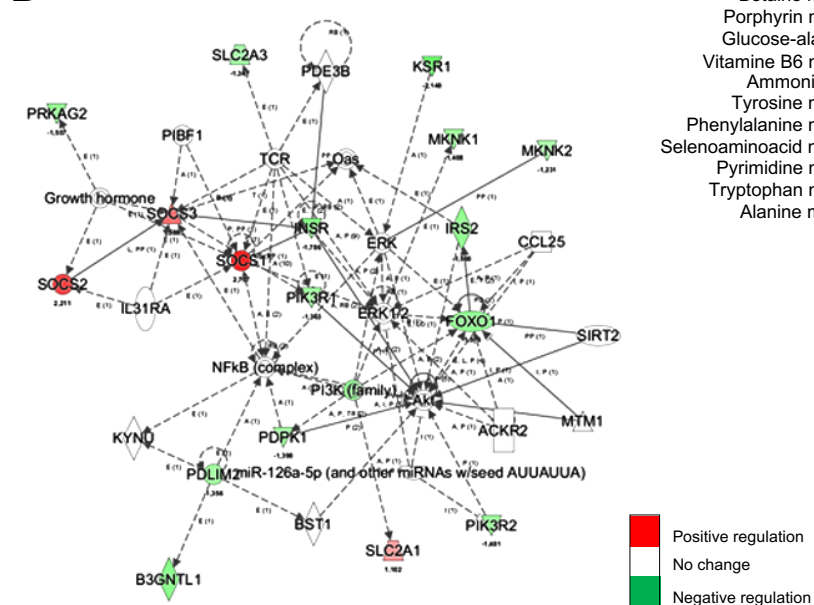

**Figure-2**

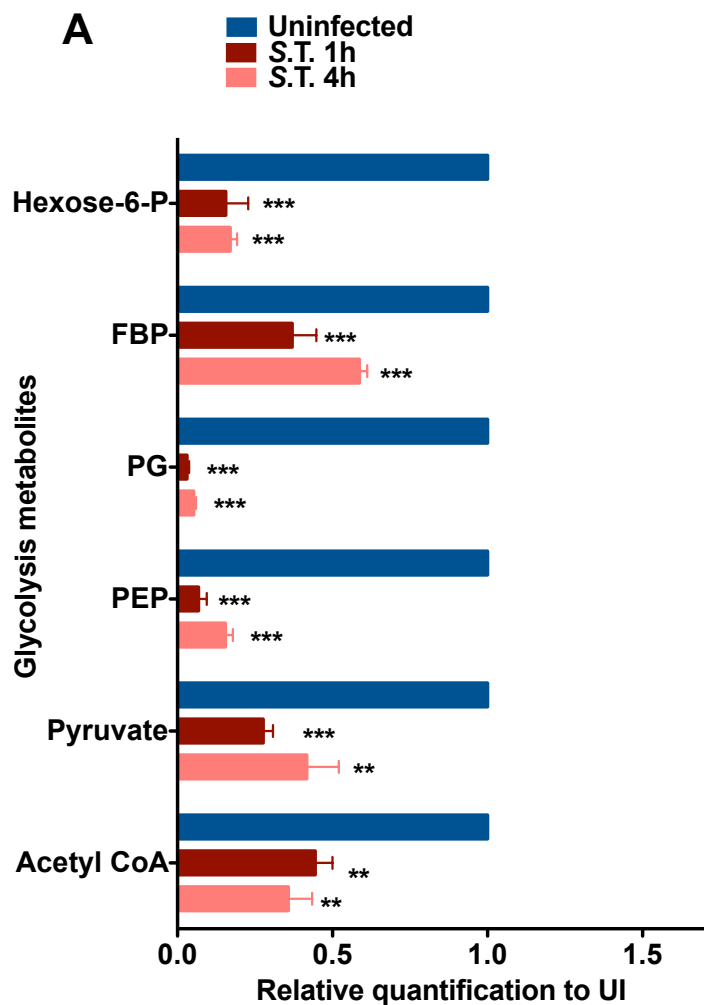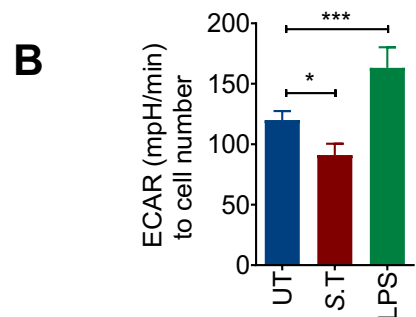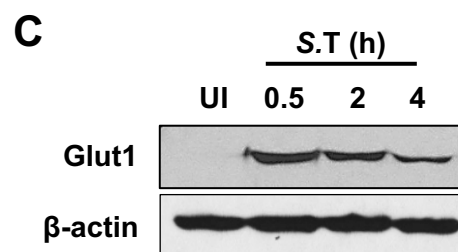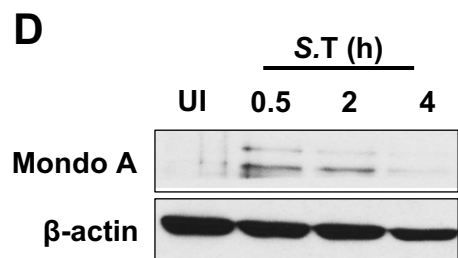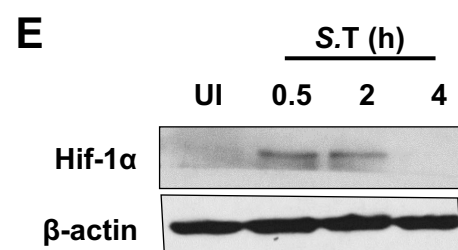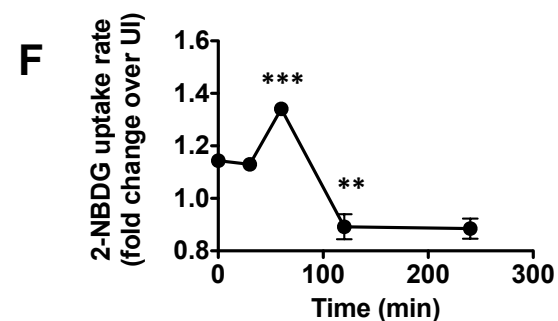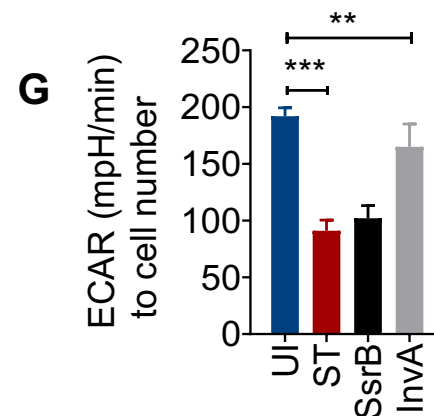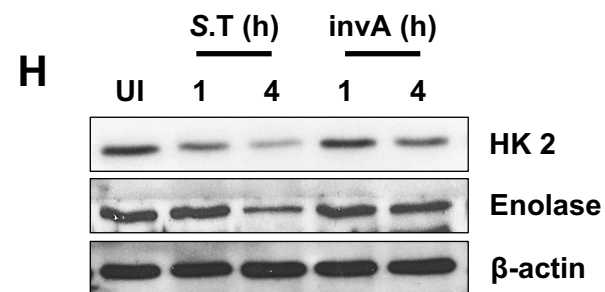

**Figure-3**

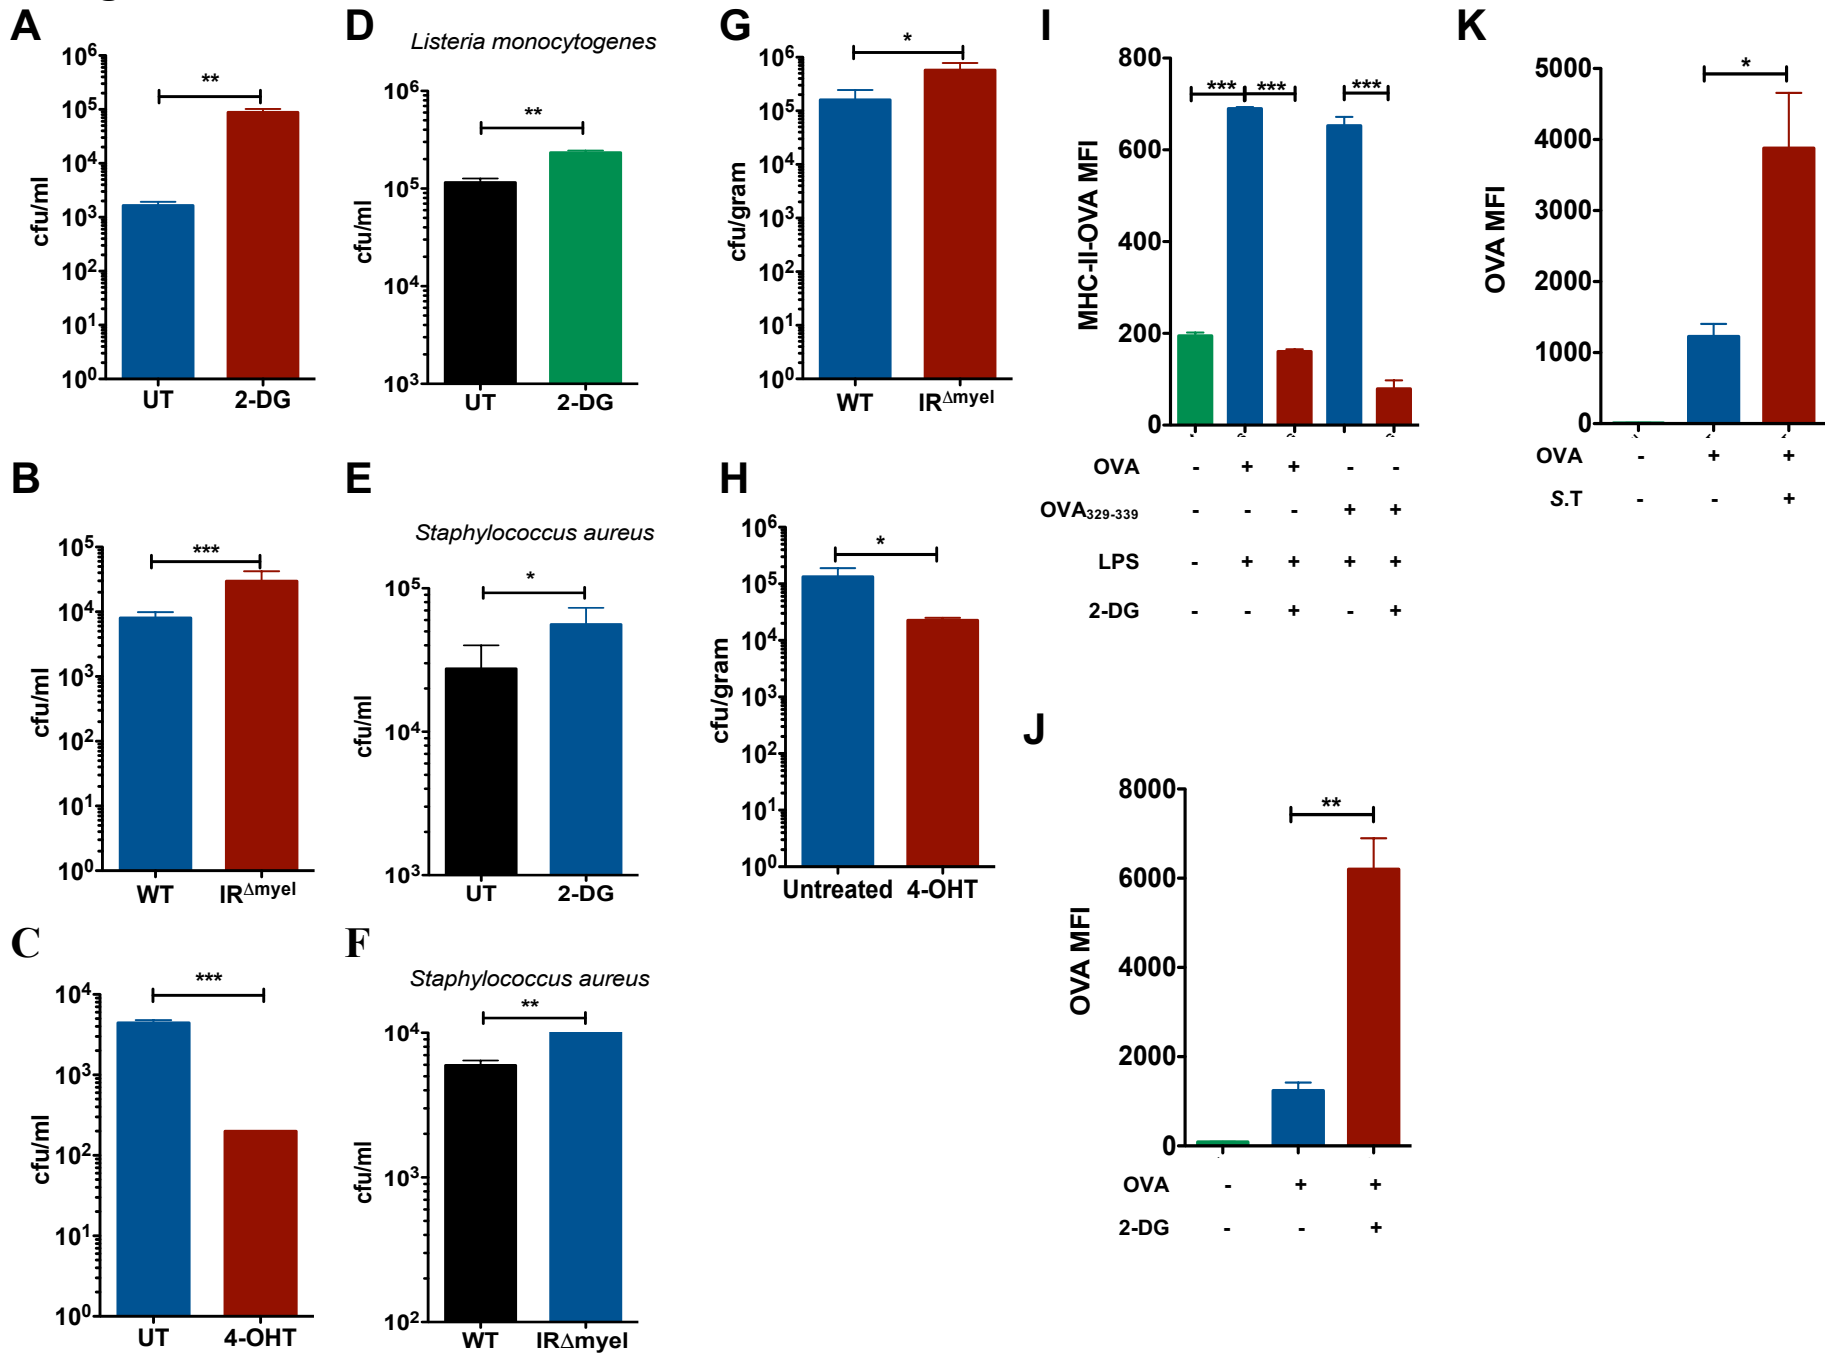

**Figure-4**

**A**

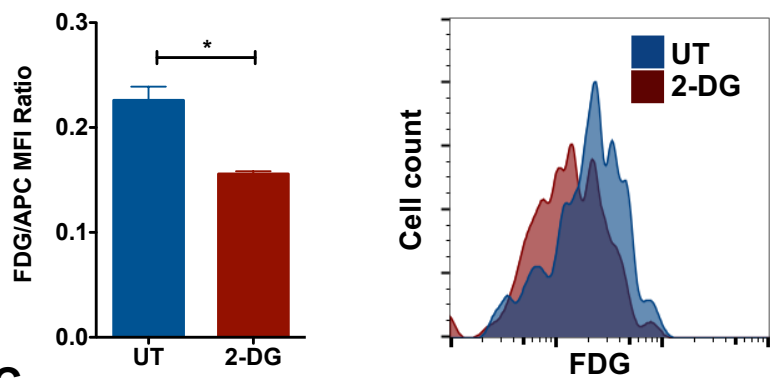

**B**

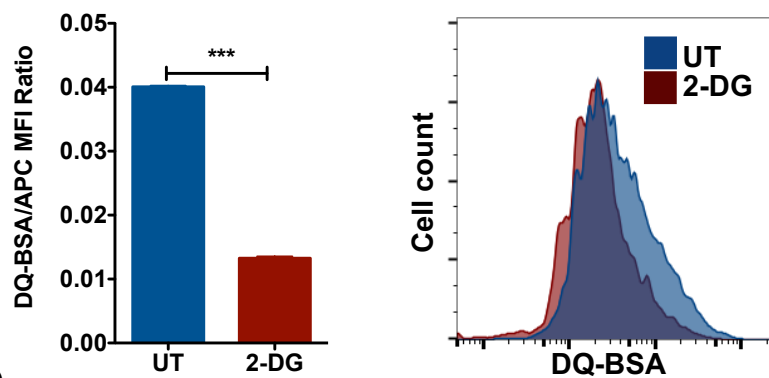

**C**

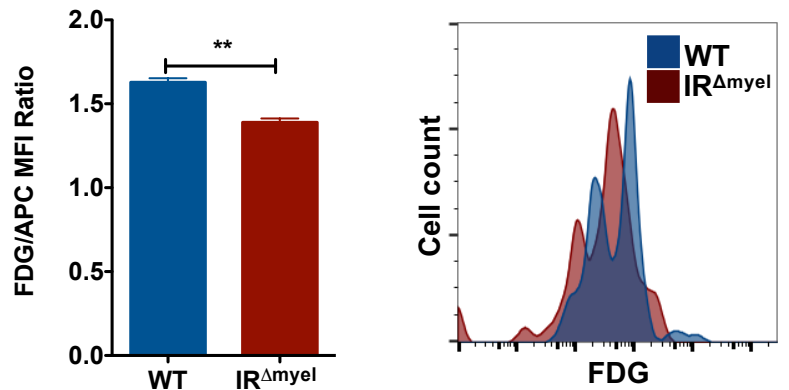

**D**

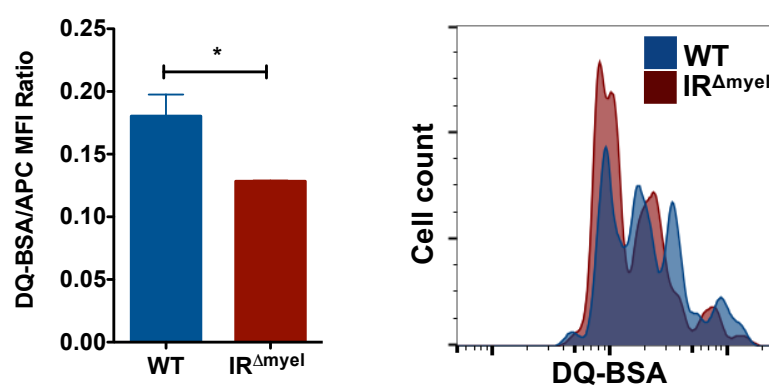

**E**

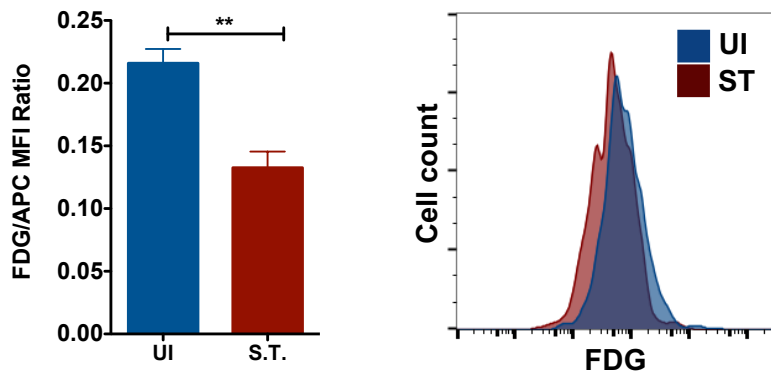



**Figure-5**

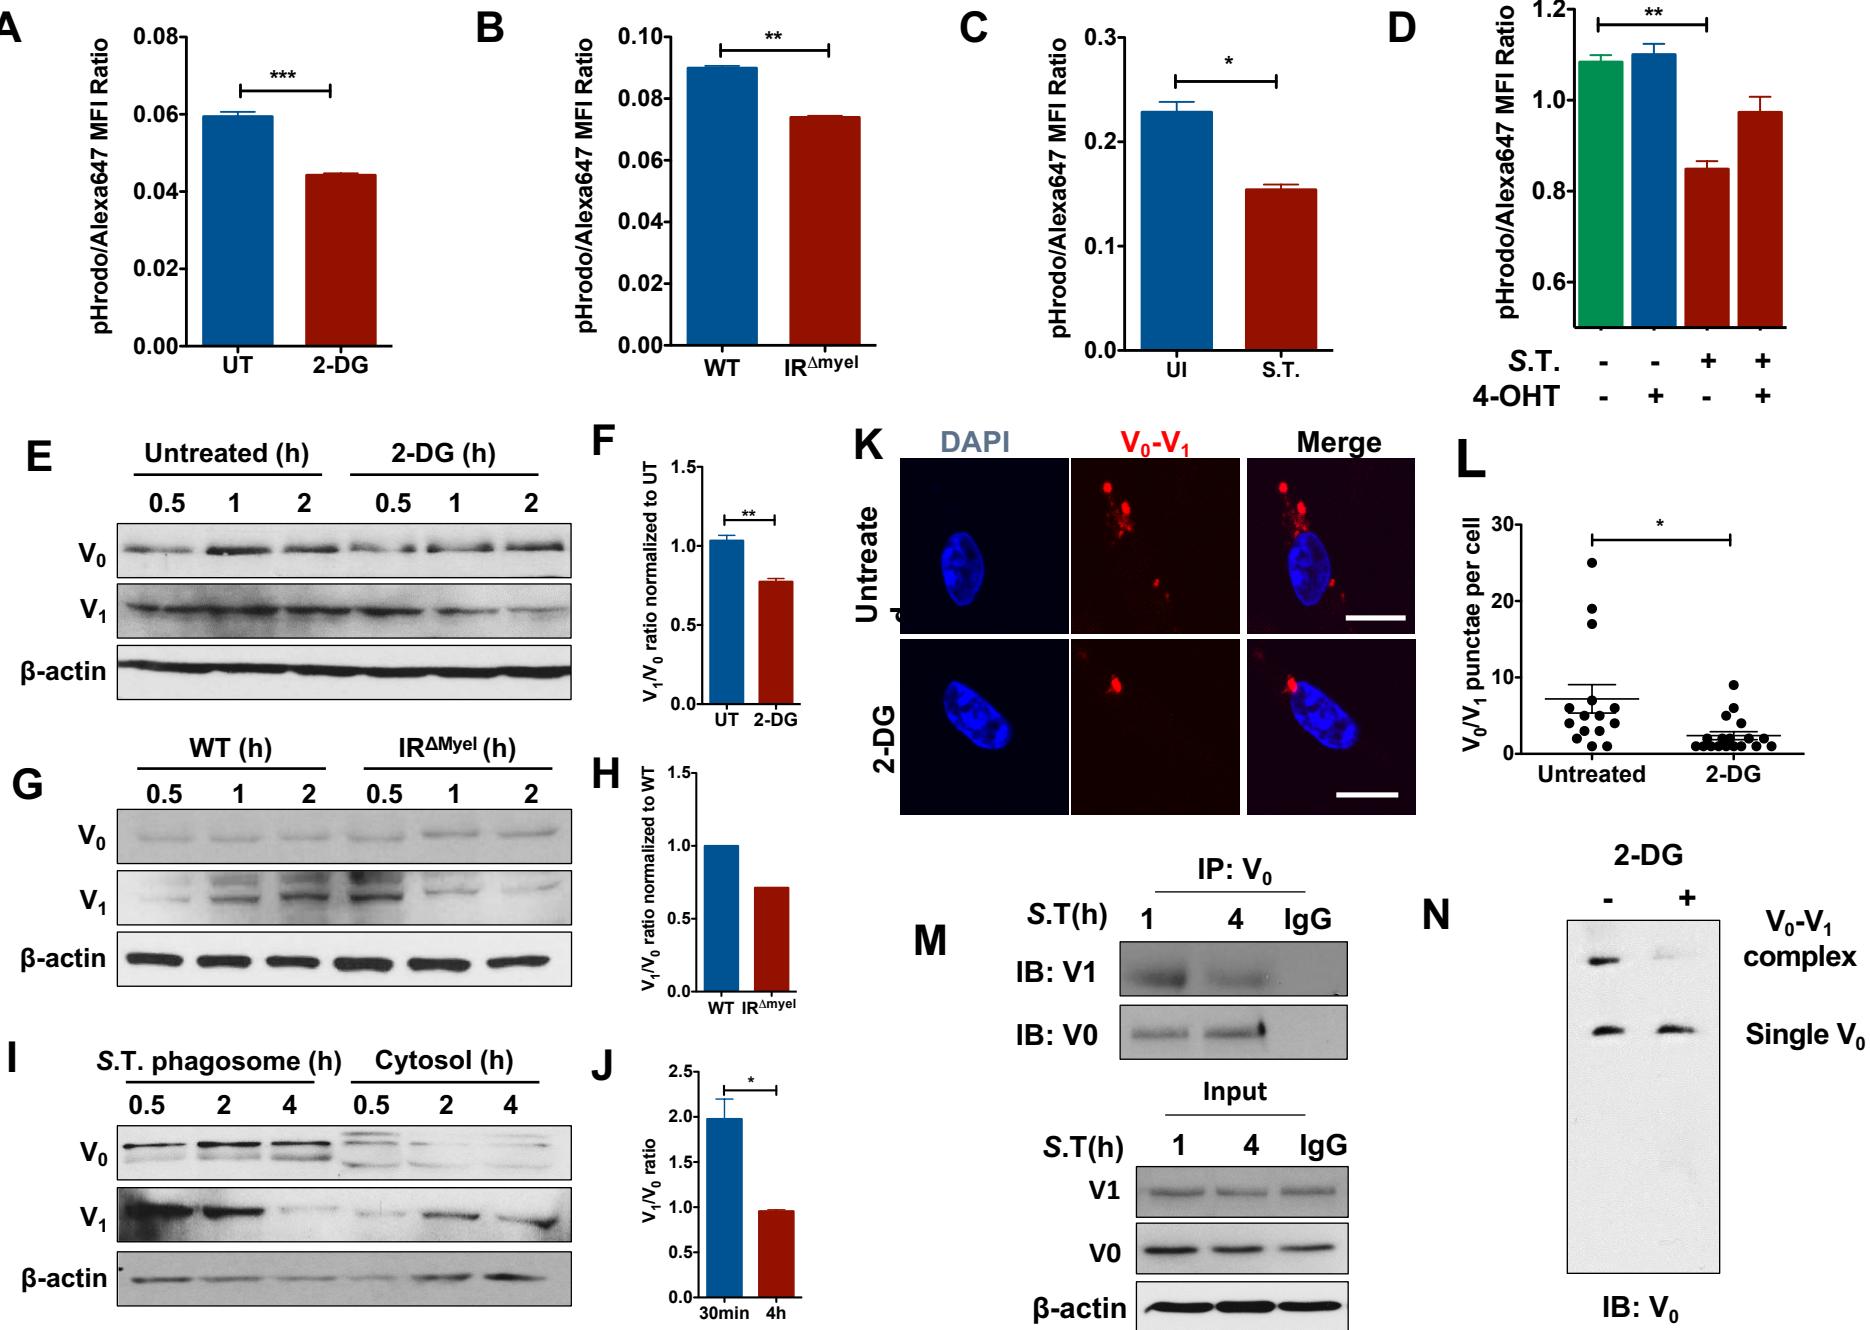



Figure 7

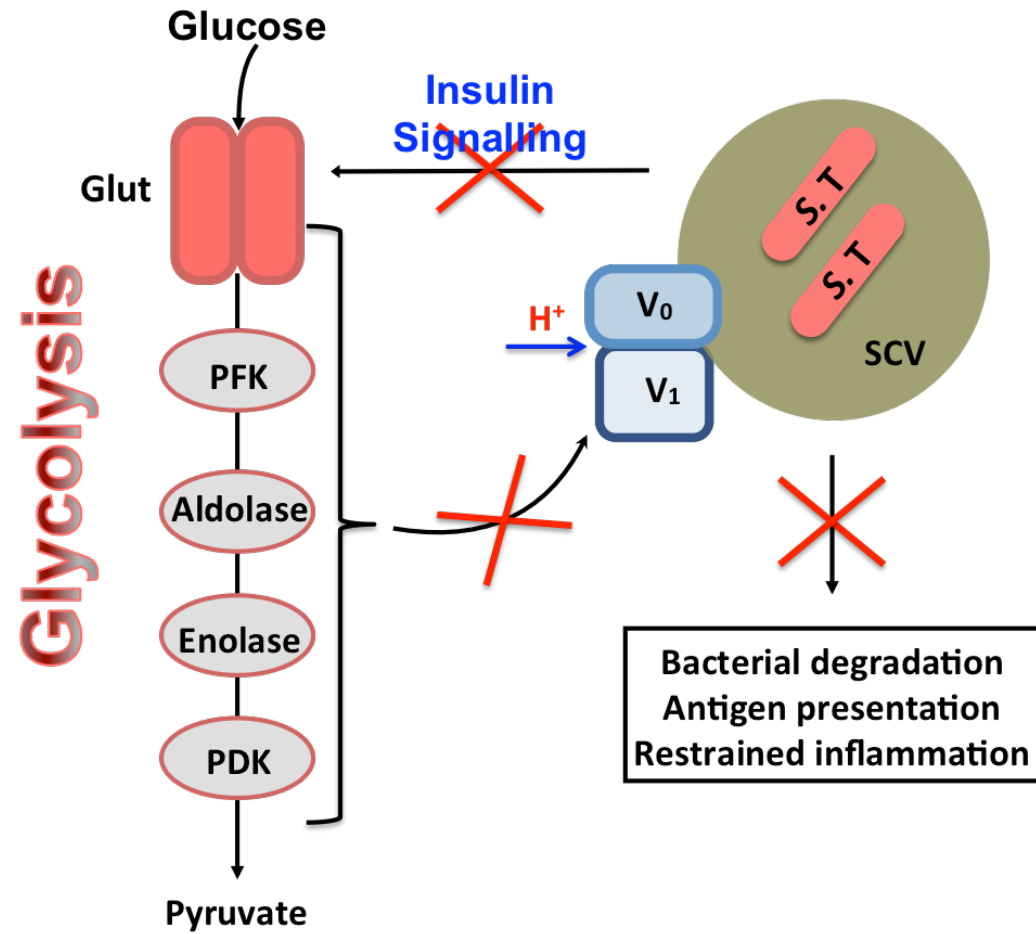

Source: https://www.biorxiv.org/content/biorxiv/early/2021/01/15/2021.01.14.426635.full.pdf
